# Supplementary material
Source: PubMed Central journal article supplement (PMC8216292)
Supplement: NIHMS1699235-supplement-Supporting_Information.pdf [file NIHMS1699235-supplement-Supporting_Information.pdf]

## **HCOOH in the remote atmosphere: Constraints from Atmospheric Tomography (ATom) airborne observations**

Xin Chen<sup>1</sup>, Dylan B. Millet<sup>1,\*</sup>, J. Andrew Neuman<sup>2,3</sup>, Patrick R. Veres<sup>2</sup>, Eric A. Ray<sup>2,3</sup>, Róisín Commane<sup>4</sup>, Bruce C. Daube<sup>5</sup>, Kathryn McKain<sup>3,6</sup>, Joshua P. Schwarz<sup>2</sup>, Joseph M. Katich<sup>2,3</sup>, Karl D. Froyd<sup>2,3</sup>, Gregory P. Schill<sup>2,3</sup>, Michelle J. Kim<sup>7</sup>, John D. Crouse<sup>7</sup>, Hannah M. Allen<sup>8</sup>, Eric C. Apel<sup>9</sup>, Rebecca S. Hornbrook<sup>9</sup>, Donald R. Blake<sup>10</sup>, Benjamin A. Nault<sup>3,11,†</sup>, Pedro Campuzano-Jost<sup>3,11</sup>, Jose L. Jimenez<sup>3,11</sup>, Jack E. Dibb<sup>12</sup>

<sup>1</sup>Department of Soil, Water, and Climate, University of Minnesota, St. Paul, MN 55108

<sup>2</sup>NOAA Chemical Sciences Laboratory, Boulder, CO 80305

<sup>3</sup>Cooperative Institute for Research in Environmental Sciences, University of Colorado Boulder, Boulder, CO 80309

<sup>4</sup>Department of Earth and Environmental Sciences, Lamont-Doherty Earth Observatory, Columbia University, New York, NY 10964

<sup>5</sup>Department of Earth and Planetary Sciences, Harvard University, Cambridge, MA 02138

<sup>6</sup>NOAA Global Monitoring Laboratory, Boulder, CO 80305

<sup>7</sup>Division of Geological and Planetary Sciences, California Institute of Technology, Pasadena, CA 91125

<sup>8</sup>Division of Chemistry and Chemical Engineering, California Institute of Technology, Pasadena, CA 91125

<sup>9</sup>Atmospheric Chemistry Observations & Modeling Laboratory, National Center for Atmospheric Research, Boulder, CO 80307

<sup>10</sup>Department of Chemistry, University of California, Irvine, CA 92697

<sup>11</sup>Department of Chemistry, University of Colorado Boulder, Boulder, CO 80309

<sup>12</sup>Earth Systems Research Center/EOS, University of New Hampshire, Durham, NH 03824

<sup>†</sup>Now at: Center for Aerosol and Cloud Chemistry, Aerodyne Research, Inc., Billerica, MA 01821

**\*Correspondence:** Dylan B. Millet (dbm@umn.edu)

**Supporting Information:**

|                                                                                                            |           |
|------------------------------------------------------------------------------------------------------------|-----------|
| <b>S1. Tables S1-S3; Figures S1-S4</b> .....                                                               | <b>3</b>  |
| <i>Table S1. Airborne HCOOH measurements in the remote atmosphere</i> .....                                | 3         |
| <i>Table S2. Reported surface seawater + lakewater concentrations of HCOOH and formate</i> .....           | 3         |
| <i>Table S3. Global HCOOH sinks</i> .....                                                                  | 3         |
| <i>Figure S1. Pearson correlation coefficient (r) between HCOOH and other observed species</i> .....       | 4         |
| <i>Figure S2. Back trajectory-derived influence from fires and the land boundary layer (BL) on HCOOH</i> 5 |           |
| <i>Figure S3. Campaign median vertical profiles for key HCOOH precursors</i> .....                         | 6         |
| <i>Figure S4. Example timeseries during DC-8 profiling showing MBL enhancements of HCOOH</i> .....         | 7         |
| <b>S2. Plume attribution</b> .....                                                                         | <b>8</b>  |
| <i>Table S4. Summary of the 53 identified plume intercepts</i> .....                                       | 9         |
| <i>S2.1 African fire plume intercepts</i> .....                                                            | 11        |
| <i>S2.2 Plumes with unusually high HCOOH:CO NEMRs</i> .....                                                | 15        |
| <i>S2.3 Other fire plume intercepts</i> .....                                                              | 17        |
| <i>S2.4 Other fire plume intercepts with potential urban/anthropogenic influence</i> .....                 | 25        |
| <b>S3. ROC related tables and figures</b> .....                                                            | <b>30</b> |
| <i>Figure S5. Same as Figure 8, but including those species measured only by WAS</i> .....                 | 31        |
| <i>Figure S6. Same as Figure 8, but including submicron aerosol OC</i> .....                               | 32        |
| <i>Table S5. ROC speciation in Figures 8, S4 and S5</i> .....                                              | 33        |
| <i>Table S6. Primary emission ratios (ERs, ppt C/ppb CO) for fire-emitted ROC species</i> .....            | 39        |
| <b>References</b> .....                                                                                    | <b>41</b> |

## S1.Tables S1-S3; Figures S1-S4

**Table S1.** Airborne HCOOH measurements in the remote atmosphere\*

| Campaign      | Aircraft platform | Location               | Timeframe    | Technique                               | References                                                                                             |
|---------------|-------------------|------------------------|--------------|-----------------------------------------|--------------------------------------------------------------------------------------------------------|
| PEM-WEST A    | DC-8              | Northwest Pacific      | Sep-Oct 1991 | Mist Chamber/Ion Chromatography (MC/IC) | Hoell et al. (1996) <sup>1</sup>                                                                       |
| TRACE-A       | DC-8              | South Atlantic         | Sep-Oct 1992 | MC/IC                                   | Fishman et al. (1996) <sup>2</sup>                                                                     |
| PEM-WEST B    | DC-8              | Northwest Pacific      | Feb-Mar 1994 | MC/IC                                   | Hoell et al. (1997) <sup>3</sup>                                                                       |
| PEM-Tropics A | DC-8              | South tropical Pacific | Aug-Sep 1996 | MC/IC                                   | Hoell et al. (1999) <sup>4</sup>                                                                       |
| SONEX         | DC-8              | North Atlantic         | Oct-Nov 1997 | MC/IC                                   | Singh et al. (1999, 20000) <sup>5, 6</sup>                                                             |
| INTEX-B       | C-130             | Northeast Pacific      | Apr-May 2006 | CIT-CIMS (CF <sub>3</sub> O)            | Kleb et al. (2011) <sup>7</sup> ; Singh et al. (2009) <sup>8</sup> ; Crouse et al. (2006) <sup>9</sup> |

\*Flight tracks at: [https://www-gte.larc.nasa.gov/GTE2/missions/Aircraft\\_Based\\_Missions/Mission\\_Maps/Mission\\_Maps.htm](https://www-gte.larc.nasa.gov/GTE2/missions/Aircraft_Based_Missions/Mission_Maps/Mission_Maps.htm)

**Table S2.** Reported surface seawater + lakewater concentrations of HCOOH and formate

| Timeframe          | Location                        | Seawater concentration                | Reference                                  |
|--------------------|---------------------------------|---------------------------------------|--------------------------------------------|
| 1958-1959          | Northeast Pacific surface water | Formic acid: 3.91 (0.65-8.26) $\mu$ M | Koyama and Thoivipson (1964) <sup>10</sup> |
|                    | Inshore surface water           | Formic acid: 10 (0.13-22.39) $\mu$ M  |                                            |
| Oct 1977           | Lake Kizaki                     | Formic acid: 1.67-2.5 $\mu$ M         | Hama and Handa (1981) <sup>11</sup>        |
| Mar, Apr, Nov 1987 | Biscayne Bay seawater           | Formate: 0.19-0.8 $\mu$ M             | Kieber et al. (2002) <sup>12</sup>         |
|                    | Oligotrophic Sargasso seawater  | Formate: 0.08-0.19 $\mu$ M            | Vaughan and Mopper (1990) <sup>13</sup>    |
|                    | Biscayne Bay coastal seawater   | Formate: 0.21-0.29 $\mu$ M            |                                            |
| Jul 1988           | Black Sea                       | Formate: <10 $\mu$ M                  | Mopper and Kieber (1991) <sup>14</sup>     |

**Table S3.** Global HCOOH sinks

|                                                | Paulot et al. (2011) <sup>15</sup> | Millet et al. (2015) <sup>16</sup> | This work                               |
|------------------------------------------------|------------------------------------|------------------------------------|-----------------------------------------|
| Simulation year                                | 2004-2008 average                  | 2013                               | 2017                                    |
| Total sink                                     | 56.7 Tg/y                          | 61.3 Tg/y                          | 44.1 Tg/y                               |
| Dry deposition                                 | 24.7 Tg/y                          | 20.8 Tg/y                          | 15.0 Tg/y (14% over ocean)              |
| Boundary layer lifetime against dry deposition |                                    |                                    | 4 d (over ocean)<br>3.3 d (over land)   |
| Wet deposition                                 | 20.1 Tg/y                          | 29.8 Tg/y                          | 21.0 Tg/y (17% over ocean)              |
| Boundary layer lifetime against wet deposition |                                    |                                    | 2.4 d (over ocean)<br>2.4 d (over land) |

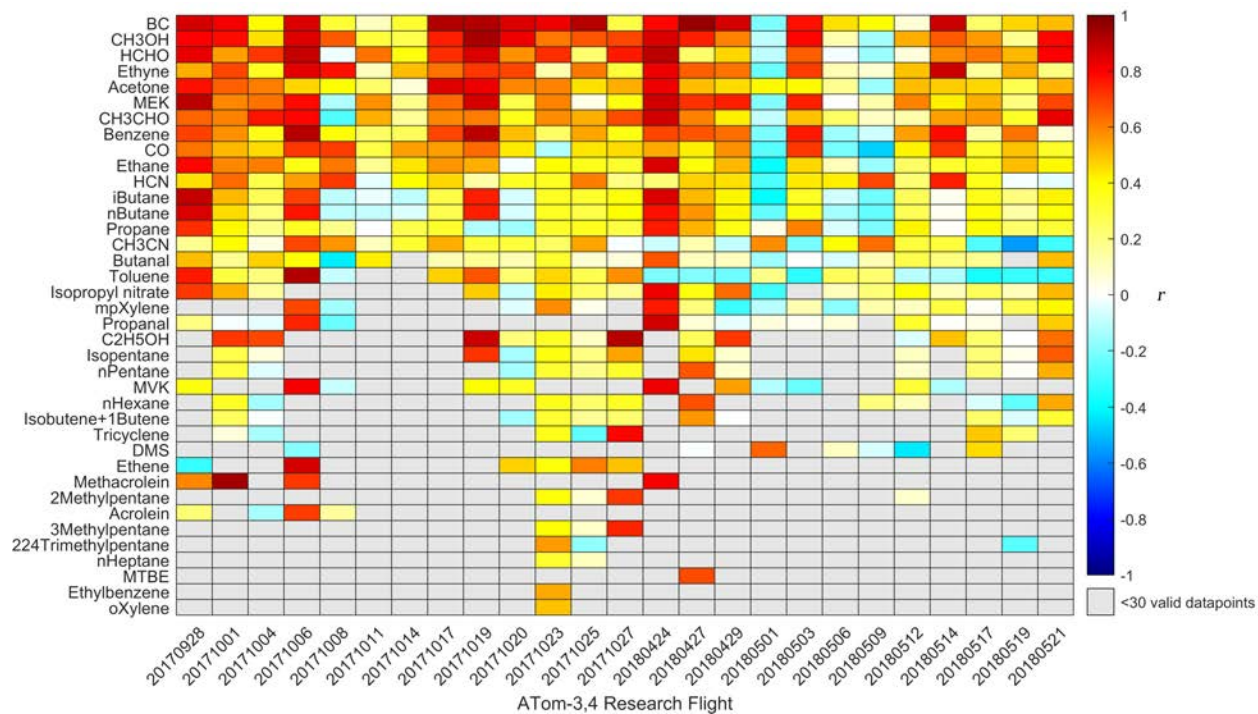

**Figure S1.** Pearson correlation coefficient ( $r$ ) between HCOOH and other observed species for each flight during ATom-3 and 4. Grey cells indicate compounds with <30 valid datapoints (i.e., excluding missing data and values below the instrumental limit of detection) for a given flight. Instrumental coverage is as described in **Section 2.1.2** of the main text. Rows are sorted by the number of flights meeting the data threshold (first) and by the mean species-HCOOH  $r$  value across flights (second).

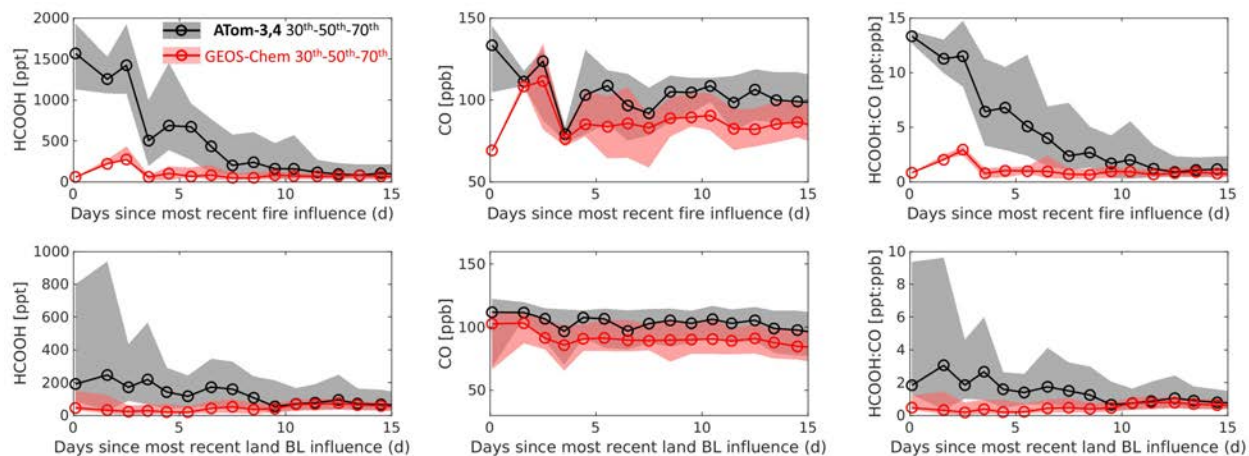

**Figure S2.** Back trajectory-derived influence from fires and the land boundary layer (BL) on HCOOH, CO, and the HCOOH:CO ratio during ATom-3,4. Data are plotted as the median of the 1-min observed (black) and predicted (red) values, binned to the most recent day since a given influence process. The time since most recent influence is calculated based on the average across a 245-trajectory cluster released each minute of the flight. Shaded regions indicate the 30<sup>th</sup>-70<sup>th</sup> percentile range. Data for 05/14/2018 are removed from this analysis due to a mid-flight instrument operational change.

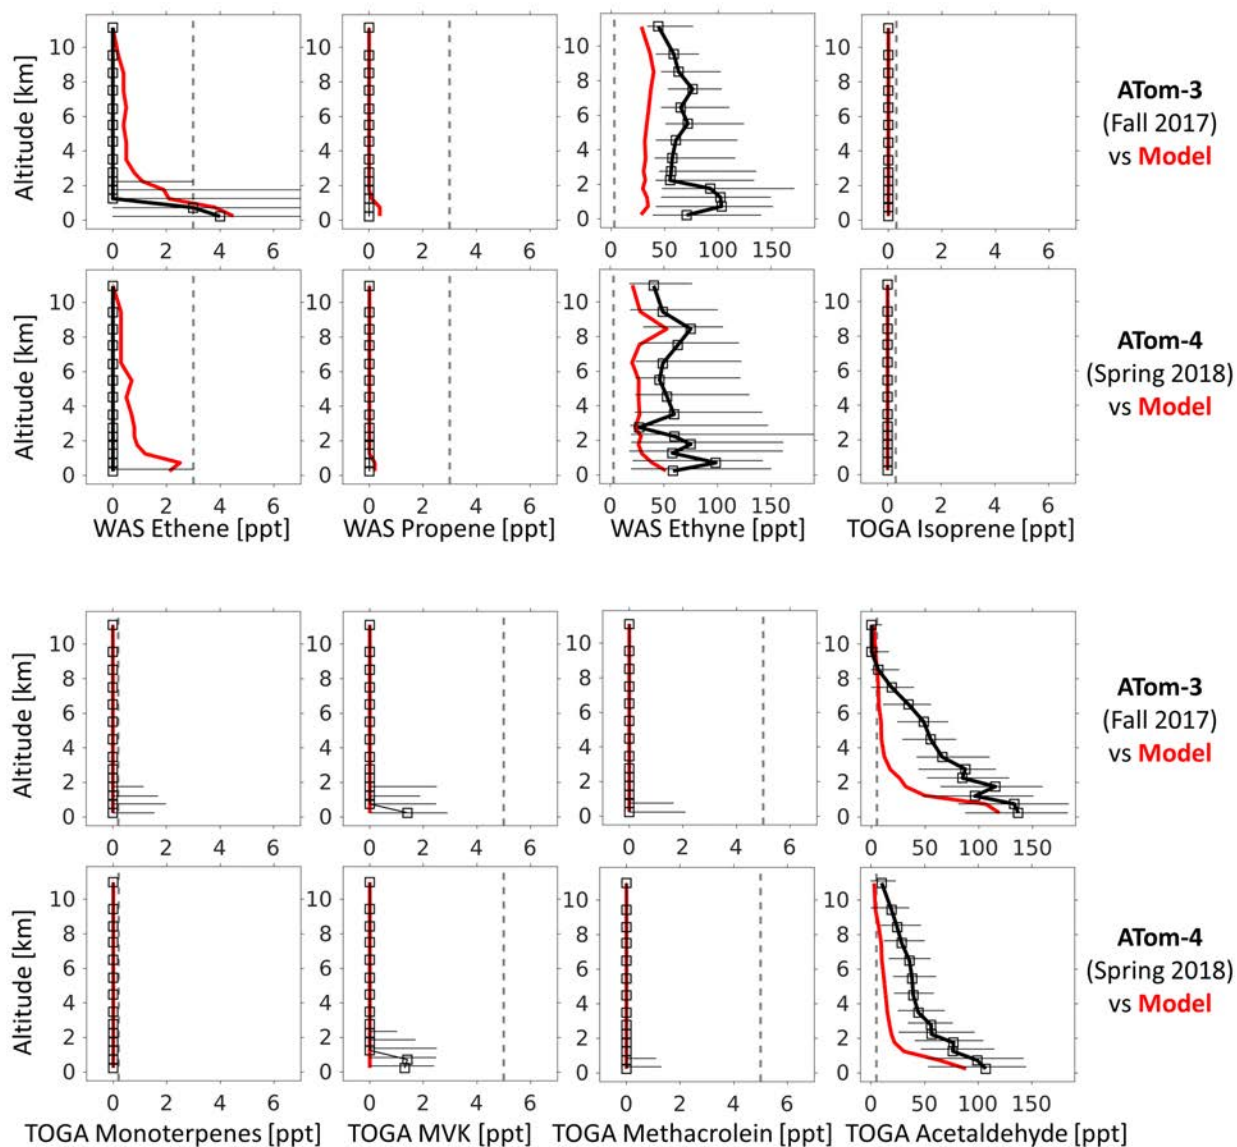

**Figure S3.** Campaign median vertical profiles for key HCOOH precursors as observed (black) and simulated by GEOS-Chem (red) during ATom-3 and ATom-4. Horizontal lines (black) indicate the measured interquartile range (IQR). Dashed vertical lines (gray) indicate the instrumental LOD (the TOGA LOD for individual monoterpenes varies between 0.1 and 20 ppt). Data flagged as below LOD are treated as zero when computing medians and IQRs.

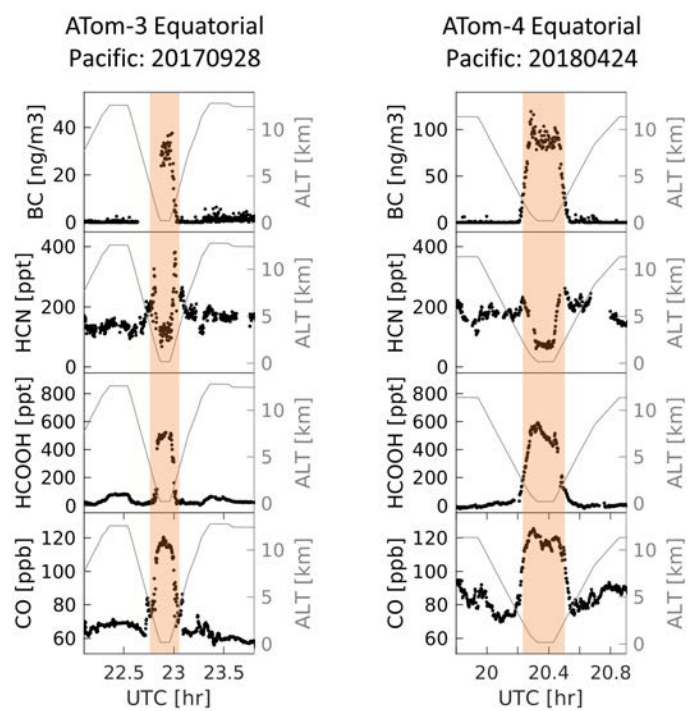

**Figure S4.** Example timeseries during DC-8 profiling showing MBL enhancements of HCOOH, along with black carbon (BC), hydrogen cyanide (HCN), CO, and altitude (ALT, grey, secondary y axis).

## S2. Plume attribution

We identified 53 fire or mixed plume intercepts as described in the main text and summarized in Table S4. Some large scale plumes were penetrated more than once in consecutive ascending and descending maneuvers (shaded in Table S4) and we treat these separately in our analysis. The following sub-sections S2.1-2.4 detail the plume identification and source attribution process with plots showing tracer timeseries, NEMR regressions, trajectory cluster distribution of plume age, and additional evidence used for plume source attribution (e.g.,  $\Delta BC/\Delta CO$ , flight-level HCOOH-CO scatter plots). Plume intercepts are numbered by time of sampling and are grouped into four categories. The plume intercept number and associated flight date are indicated in the title for each sub-section.

**Plume identification — Flight timeseries:** For each individual or group of plume intercepts being characterized we present the corresponding flight timeseries for black carbon (BC), hydrogen cyanide (HCN), HCOOH, CO, PALMS biomass burning particle number fraction (hereinafter “PALMS BB fraction”)<sup>17</sup>, NO<sub>x</sub> (NO+NO<sub>2</sub>), and altitude (ALT, grey, secondary y axis), with plume intercept windows shaded in orange and plume intercept numbers marked in the top (or second) panel. Dashed horizontal lines show thresholds employed in plume identification (BC: 100 ng/m<sup>3</sup>, HCOOH: 1 ppb, CO: 175 ppb) and also indicate 50% fire influence for the PALMS BB fraction.

**NEMR calculation — Plume HCOOH-CO regression:** For each individual plume intercept, we show the reduced major axis regression (fit line in orange) of HCOOH and CO mixing ratios during the plume intercept (data points in blue) along with relevant statistical information. The NEMR of HCOOH relative to CO is obtained as the slope of this regression.

**Plume age determination — Distribution of plume age in back trajectory clusters:** We define the physical age of the plume as the time since most recent fire influence ( $t_f$ ) according to the back trajectories. As described in **Section 2.3** of the main text, a cluster of 245 particles are released every minute along the flight track, generating up to 245  $t_f$  estimates (typically less as some trajectories do not encounter any fire plumes). We then visualize the  $t_f$  distribution for each cluster within the plume intercept window. Based on these distributions, each plume intercept is assigned to one of seven age classes: <1 day, 0-5 days, 1-5 days, 1-10 days, 5-10 days, >10 days, or not determined (ND). For plumes in the first six groups, we illustrate below 1-2 representative distributions within the corresponding plume intercept window. The ND age group contains fire plumes without a well-defined age distribution or source regions (see below).

**Plume source identification — Fire influence probability map:** For each plume intercept below, a fire influence probability map is shown for the same trajectory cluster highlighted in the plume age distribution plot. Colored grid cells in these maps denote the fire source locations identified through the back trajectory analysis. Maps also indicate the flight tracks (in orange) and plume intercept locations (red). For plume intercepts with no clear fire influence in the back trajectories, we do not estimate an age or source region.



**Table S4.** Summary of the 53 identified plume intercepts. Consecutively shaded plume intercepts were identified in consecutive ascents and descents.

| Plume intercept # | Flight   | Time window (UTC in seconds) | HCOOH:CO NEMR (ppt/ppb CO) | Fire age category (days) | Fire source region    | Source attribution                 | See details in SI page # |
|-------------------|----------|------------------------------|----------------------------|--------------------------|-----------------------|------------------------------------|--------------------------|
| 1                 | 20170928 | [52590, 53020]               | 63.9                       | > 10                     | N. America            | Fire w/ potential anthro influence | <a href="#">p25</a>      |
| 2                 | 20171006 | [99780, 100300]              | 11.2                       | < 1                      | Fiji                  | Fire w/ potential anthro influence | <a href="#">p26</a>      |
| 3                 | 20171017 | [41870, 42000]               | 168.8                      | 1-5                      | S. America            | Fire w/ potential anthro influence | <a href="#">p16</a>      |
| 4                 | 20171017 | [42570, 42720]               | 136.4                      | 1-5                      | S. America            | Fire w/ potential anthro influence | <a href="#">p16</a>      |
| 5                 | 20171017 | [68760, 69280]               | 56.7                       | 5-10                     | S. Africa             | Fire                               | <a href="#">p11</a>      |
| 6                 | 20171019 | [31200, 31480]               | 19.5                       | 1-10                     | S. Africa             | Fire                               | <a href="#">p12</a>      |
| 7                 | 20171019 | [33430, 33750]               | 16.6                       | 1-10                     | S. Africa             | Fire                               | <a href="#">p12</a>      |
| 8                 | 20171019 | [34320, 34600]               | 19.2                       | 1-10                     | S. Africa             | Fire                               | <a href="#">p12</a>      |
| 9                 | 20171019 | [41200, 41400]               | 42.8                       | 1-5                      | N. Africa             | Fire                               | <a href="#">p12</a>      |
| 10                | 20171019 | [42370, 43600]               | 36.6                       | 1-5                      | N. Africa             | Fire                               | <a href="#">p12</a>      |
| 11                | 20171019 | [46670, 47260]               | 62.5                       | 1-5                      | N. Africa             | Fire                               | <a href="#">p12</a>      |
| 12                | 20171020 | [33700, 34130]               | 22.2                       | 1-10                     | N. Africa             | Fire                               | <a href="#">p13</a>      |
| 13                | 20171020 | [37740, 37980]               | 35.1                       | 1-5                      | N. Africa             | Fire                               | <a href="#">p13</a>      |
| 14                | 20171020 | [39500, 39620]               | 33.6                       | 1-5                      | N. Africa             | Fire                               | <a href="#">p13</a>      |
| 15                | 20171020 | [42700, 43040]               | 26.1                       | 1-5                      | N. Africa             | Fire                               | <a href="#">p13</a>      |
| 16                | 20171020 | [45240, 45520]               | 30.0                       | 1-10                     | N. Africa             | Fire                               | <a href="#">p13</a>      |
| 17                | 20171025 | [74040, 74240]               | 9.8                        | 5-10                     | NE. Asia              | Fire                               | <a href="#">p17</a>      |
| 18                | 20171027 | [68170, 68220]               | 4.2                        | ND                       | ND                    | Fire                               | <a href="#">p18</a>      |
| 19                | 20171027 | [70670, 70910]               | 3.4                        | ND                       | ND                    | Fire                               | <a href="#">p18</a>      |
| 20                | 20180424 | [53120, 53240]               | 60.7                       | 1-5                      | NE. Asia + N. America | Fire w/ potential anthro influence | <a href="#">p27</a>      |
| 21                | 20180424 | [77400, 77660]               | 20.1                       | 5-10                     | C. America            | Fire                               | <a href="#">p19</a>      |
| 22                | 20180424 | [86760, 87130]               | 24.5                       | 0-5                      | NE. Asia + N. America | Fire w/ potential anthro influence | <a href="#">p27</a>      |
| 23                | 20180427 | [57840, 58010]               | 19.1                       | < 1                      | N. America            | Fire w/ potential anthro influence | <a href="#">p28</a>      |
| 24                | 20180427 | [71420, 71560]               | 58.9                       | ND                       | E. Asia               | Fire                               | <a href="#">p20</a>      |
| 25                | 20180427 | [74460, 74900]               | 37.8                       | 1-5                      | E. Asia               | Fire                               | <a href="#">p20</a>      |
| 26                | 20180427 | [76560, 77040]               | 47.5                       | 1-5                      | E. Asia               | Fire                               | <a href="#">p20</a>      |
| 27                | 20180427 | [93700, 93800]               | 43.2                       | 1-10                     | E. Asia               | Fire                               | <a href="#">p20</a>      |
| 28                | 20180429 | [69560, 70600]               | 38.2                       | 1-10                     | Eurasia               | Fire                               | <a href="#">p21</a>      |
| 29                | 20180429 | [70880, 71180]               | 31.8                       | 1-10                     | Eurasia               | Fire                               | <a href="#">p21</a>      |
| 30                | 20180429 | [77180, 77360]               | 10.3                       | 5-10                     | Eurasia               | Fire                               | <a href="#">p21</a>      |
| 31                | 20180429 | [77420, 77500]               | 43.2                       | 5-10                     | Eurasia               | Fire                               | <a href="#">p21</a>      |
| 32                | 20180429 | [78420, 78640]               | 24.1                       | 5-10                     | Eurasia               | Fire                               | <a href="#">p21</a>      |
| 33                | 20180503 | [92840, 92960]               | 57.2                       | 5-10                     | SE. Australia         | Fire w/ potential anthro influence | <a href="#">p29</a>      |
| 34                | 20180503 | [93620, 93720]               | 70.8                       | 5-10                     | SE. Australia         | Fire w/ potential anthro influence | <a href="#">p29</a>      |

|    |          |                |       |      |                      |                                    |                     |
|----|----------|----------------|-------|------|----------------------|------------------------------------|---------------------|
| 35 | 20180503 | [95760, 95900] | 49.3  | 1-10 | SE. Australia        | Fire w/ potential anthro influence | <a href="#">p28</a> |
| 36 | 20180503 | [96200, 96760] | 26.5  | 1-5  | SE. Australia        | Fire w/ potential anthro influence | <a href="#">p28</a> |
| 37 | 20180514 | [48820, 49400] | 47.9  | 1-10 | N. Africa            | Fire                               | <a href="#">p13</a> |
| 38 | 20180514 | [49700, 50080] | 43.0  | 1-10 | N. Africa            | Fire                               | <a href="#">p13</a> |
| 39 | 20180514 | [53740, 54010] | 139.4 | 1-10 | N. Africa            | Fire                               | <a href="#">p13</a> |
| 40 | 20180514 | [57240, 57600] | 112.3 | 1-10 | N. Africa            | Fire                               | <a href="#">p13</a> |
| 41 | 20180514 | [57960, 58260] | 129.3 | 1-10 | N. Africa            | Fire                               | <a href="#">p13</a> |
| 42 | 20180514 | [60690, 60900] | 97.8  | ND   | N. + C. Africa       | Fire                               | <a href="#">p13</a> |
| 43 | 20180514 | [61620, 61780] | 96.0  | ND   | N. Africa            | Fire                               | <a href="#">p13</a> |
| 44 | 20180517 | [38400, 38510] | 11.2  | ND   | ND                   | Fire                               | <a href="#">p21</a> |
| 45 | 20180517 | [51090, 51210] | 24.2  | ND   | ND                   | Fire                               | <a href="#">p21</a> |
| 46 | 20180517 | [53170, 53240] | 26.1  | ND   | ND                   | Fire                               | <a href="#">p21</a> |
| 47 | 20180519 | [73440, 73620] | 54.1  | ND   | Eurasia              | Fire                               | <a href="#">p22</a> |
| 48 | 20180519 | [74260, 75020] | 31.0  | ND   | Eurasia              | Fire                               | <a href="#">p22</a> |
| 49 | 20180521 | [73160, 73280] | 68.2  | ND   | Eurasia              | Fire                               | <a href="#">p23</a> |
| 50 | 20180521 | [81980, 82410] | 87.4  | 0-5  | N. America + E. Asia | Fire w/ potential anthro influence | <a href="#">p14</a> |
| 51 | 20180521 | [82500, 82960] | 55.3  | < 1  | N. America + E. Asia | Fire w/ potential anthro influence | <a href="#">p14</a> |
| 52 | 20180521 | [83220, 83420] | 241.4 | ND   | N. America + E. Asia | Fire w/ potential anthro influence | <a href="#">p14</a> |
| 53 | 20180521 | [84200, 84620] | 206.5 | ND   | N. America + E. Asia | Fire w/ potential anthro influence | <a href="#">p14</a> |

**S2.1 African fire plume intercepts: #5 (20171017), #6-11 (20171019), #12-16 (20171020), #37-43 (20180514)**

**Plume intercept #5 (20171017):** This plume was intercepted prior to landing in Ascension Island. Elevated values of the PALMS BB fraction and individual fire tracers reflect a dominant fire influence from southern Africa. Classification: *fire plume*.

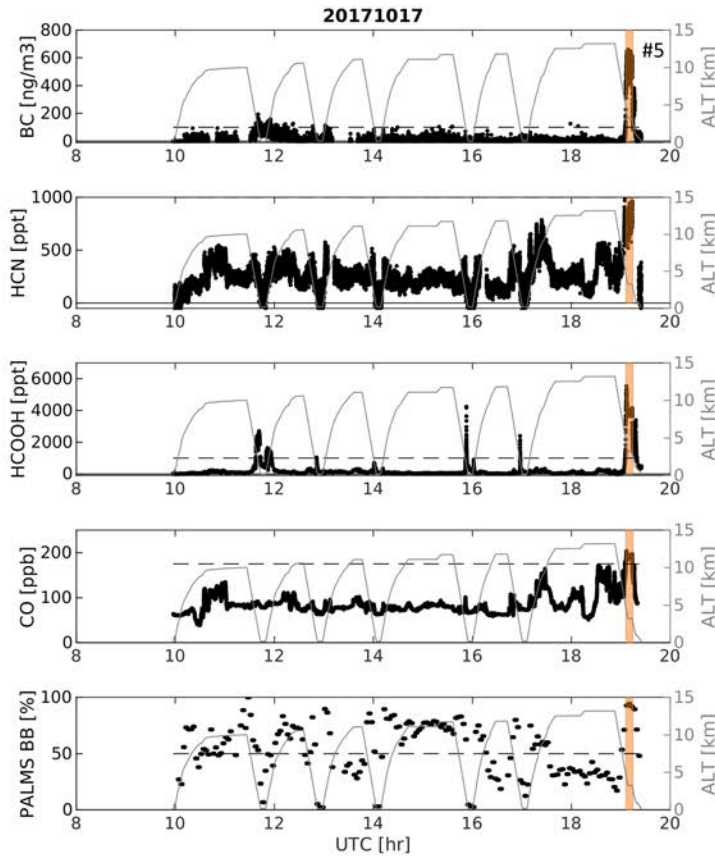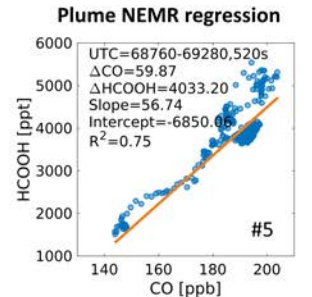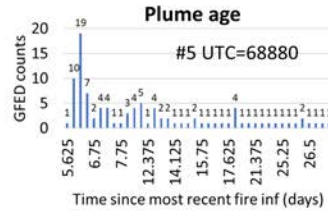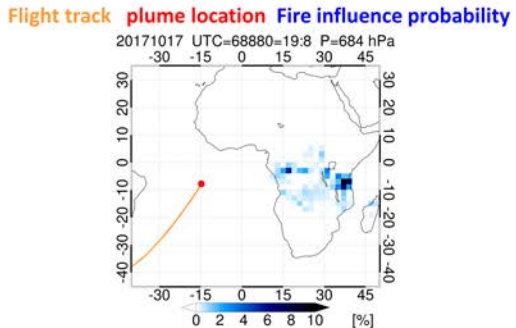

**Plume intercepts #6-11 (20171019):** These plumes were intercepted during the flight from Ascension Island to Cabo Verde. Back trajectories indicate that plume intercepts #6-8 originated in southern Africa, while plume intercepts #9-11 mainly originated in northern Africa. Although the PALMS BB fraction suggests low to moderate fire influence for plume intercepts #8-11, back trajectory analysis shows clear fire influence for plume intercepts #9-11 in particular. In addition, BC and CO are highly correlated in each plume intercept, with consistent  $\Delta BC/\Delta CO$  regression slopes (5.8-8.3 ng BC/m<sup>3</sup>/ppb CO) that are within the range of BC:CO emission ratios for major African fire types reported by<sup>18</sup>—i.e., savanna: 8.1 ng BC/m<sup>3</sup>/ppb CO, tropical forest: 5.1 ng BC/m<sup>3</sup>/ppb CO, agricultural residue: 5.8 ng BC/m<sup>3</sup>/ppb CO. Classification: *fire plumes*.

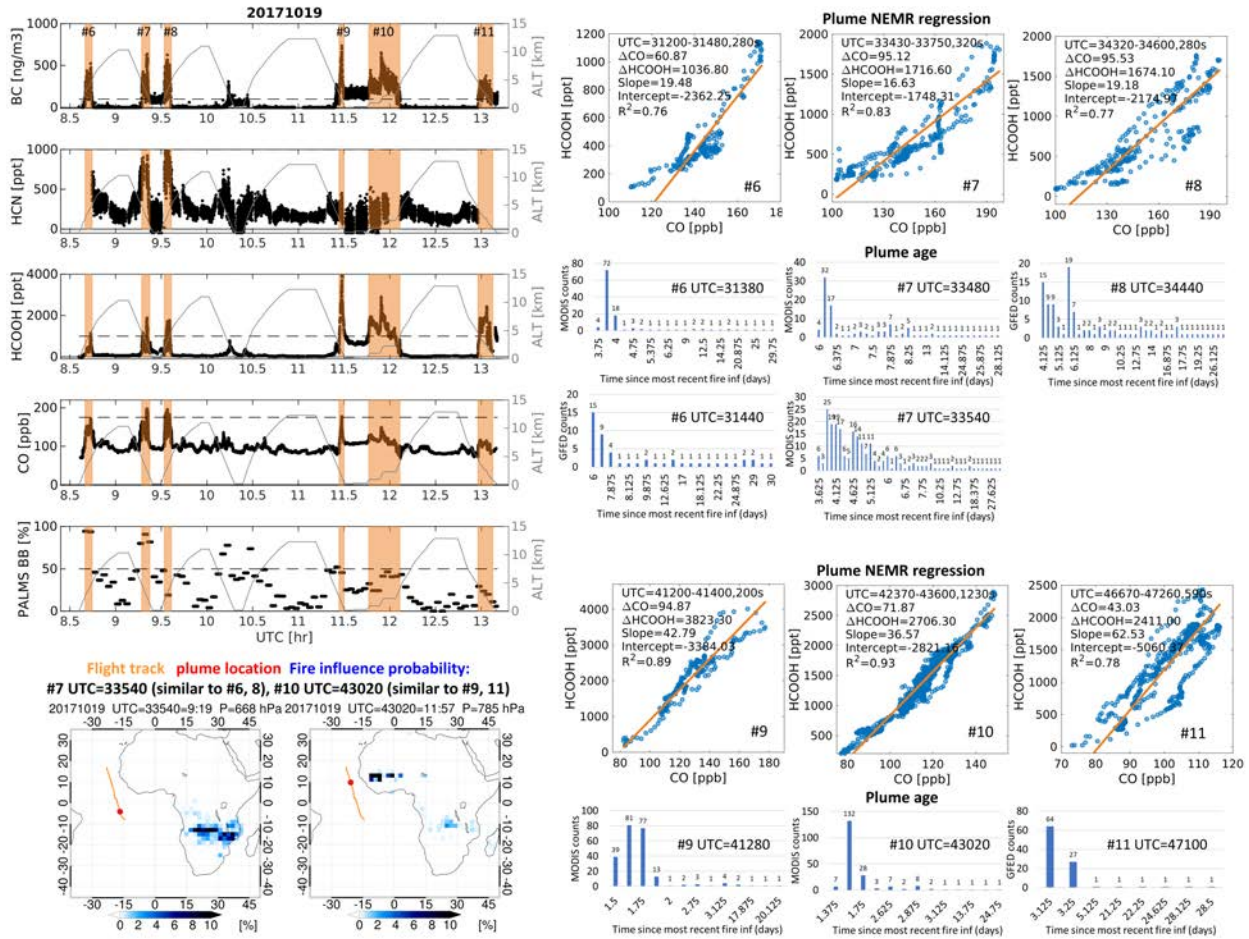



**Plume intercepts #37-43 (20180514):** Plumes intercepted by this flight are clearly identified as fire plumes from northwestern Africa, with consistent enhancements for the PALMS BB fraction and individual fire tracers. The  $\Delta BC/\Delta CO$  regression slopes for these plumes (6.6-8.9 ng BC/m<sup>3</sup>/ppb CO) are close to the corresponding emission ratios for relevant fire types (5.1-8.1 ng BC/m<sup>3</sup>/ppb CO; Andreae, 2019). Classification: *fire plumes*.

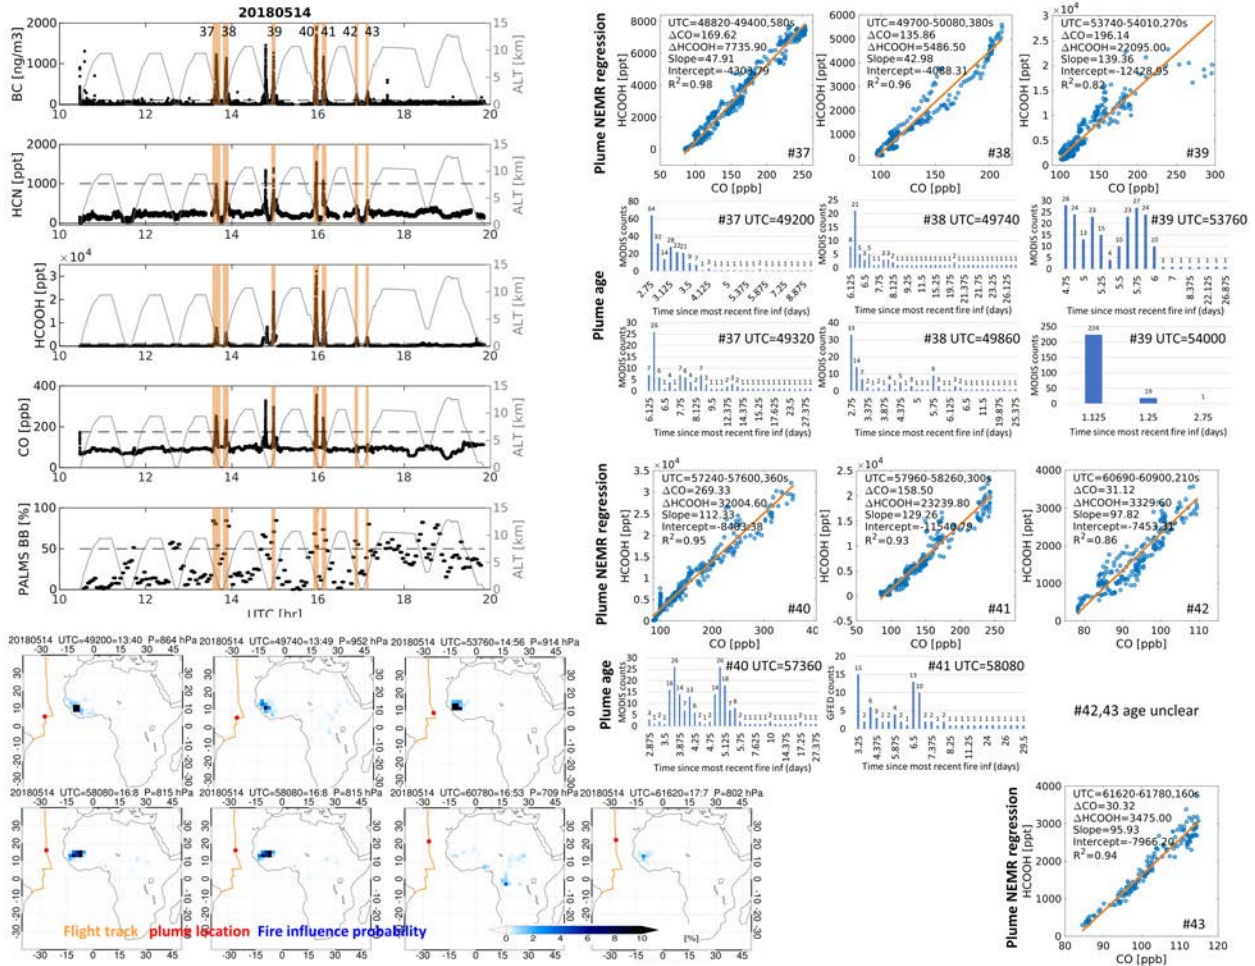

## S2.2 Plumes with unusually high HCOOH:CO NEMRs: #50-53 (20180521), #3-4 (20171017)

**Plume intercepts #50-53 (20180521):** This is the final ATom flight. Prior to landing in CA, large HCOOH enhancements (reaching several ppb above background) are observed near and within the boundary layer. However, CO is only slightly elevated above background, resulting in quite high HCOOH:CO NEMR values of 55-241 ppt/ppb CO.

While the PALMS BB fraction suggests only low-to-moderate fire influence, back trajectories point to California fire sources for plume intercepts #50-51. Urban emissions may also contribute to the observed enhancements, but alone would only be expected to yield  $\Delta\text{HCOOH}/\Delta\text{CO}$  ratios of up to  $\sim 20$  ppt/ppb CO<sup>19</sup>. Prior work by Hecobian et al. (2011)<sup>20</sup> pointed out the high oxidative potential in mixed plumes over California containing both urban and wildfire emissions, with accompanying elevated NEMRs for both NO<sub>x</sub> and NO<sub>y</sub>. The unusually high HCOOH NEMRs in these ATom plume intercepts could therefore reflect chemistry associated with fire-urban pollution interactions—specifically, VOC-rich biomass burning emissions mixing with high levels of urban NO<sub>x</sub><sup>21</sup>.

Classification: *fire plumes with potential urban/anthropogenic influence*

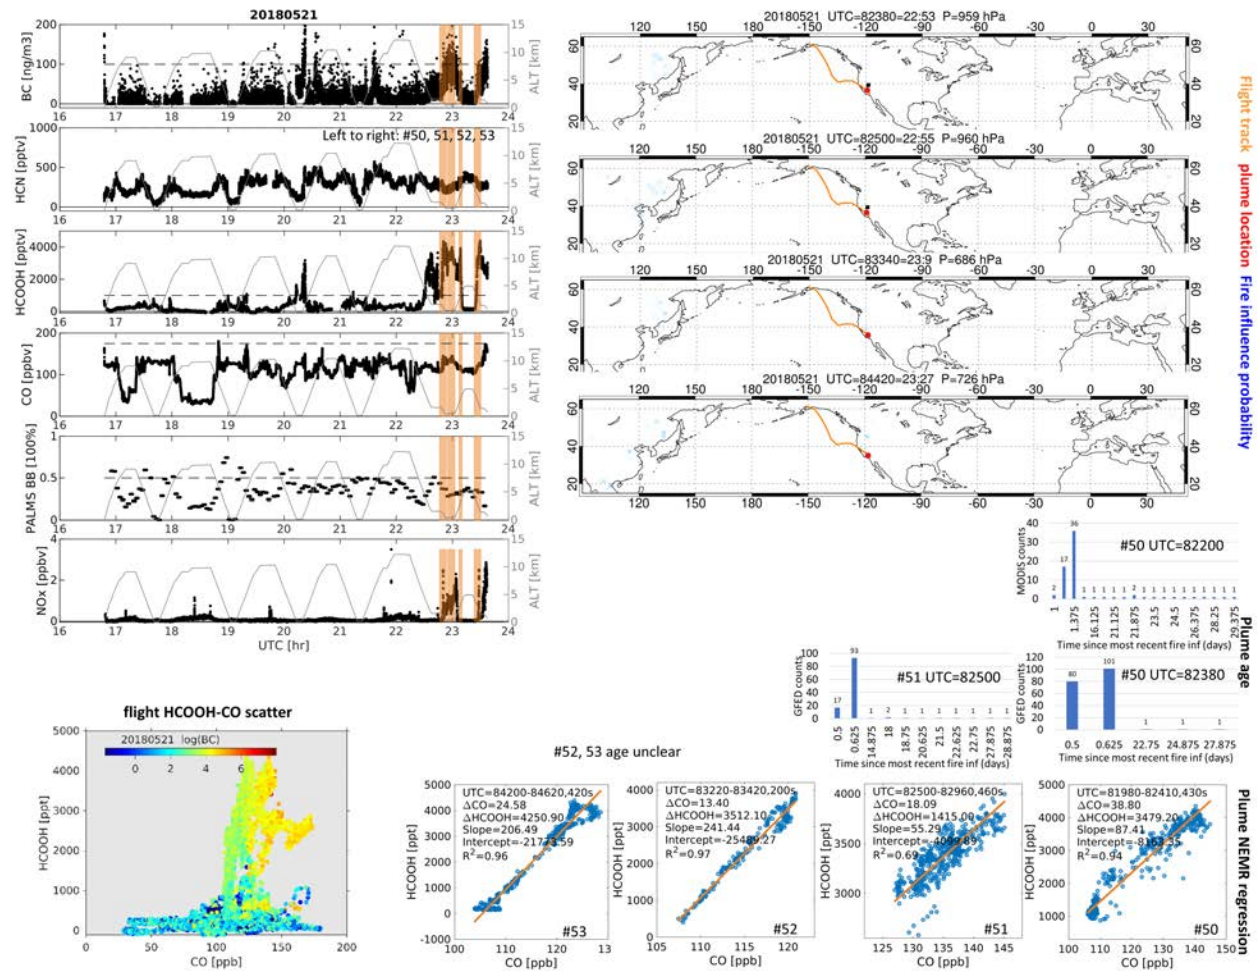

**Plume intercepts #3-4 (20171017):** These two plume intercepts were intercepted downwind of South America during the first vertical profile of the flight. The PALMS BB fraction is ambiguous as to the extent of fire influence. The encountered plume intercepts exhibit highly elevated methanol (> 6 ppb) and ethanol (> 1 ppb). The > 1ppb ethanol is very high for a remote ocean sample, and much higher than would be found in a fire plume. However, ethanol is used extensively as a fuel additive in parts of South America. The isopentane:nPentane ratio in this profiling maneuver ranges from 1 to 1.9, further implying anthropogenic influence.

The  $\Delta\text{HCOOH}/\Delta\text{CO}$  NEMR values in these plume intercepts are unusually high (as also evident in the HCOOH-CO scatter plot for the entire flight). Classification: *fire plumes with potential urban/anthropogenic influence*.

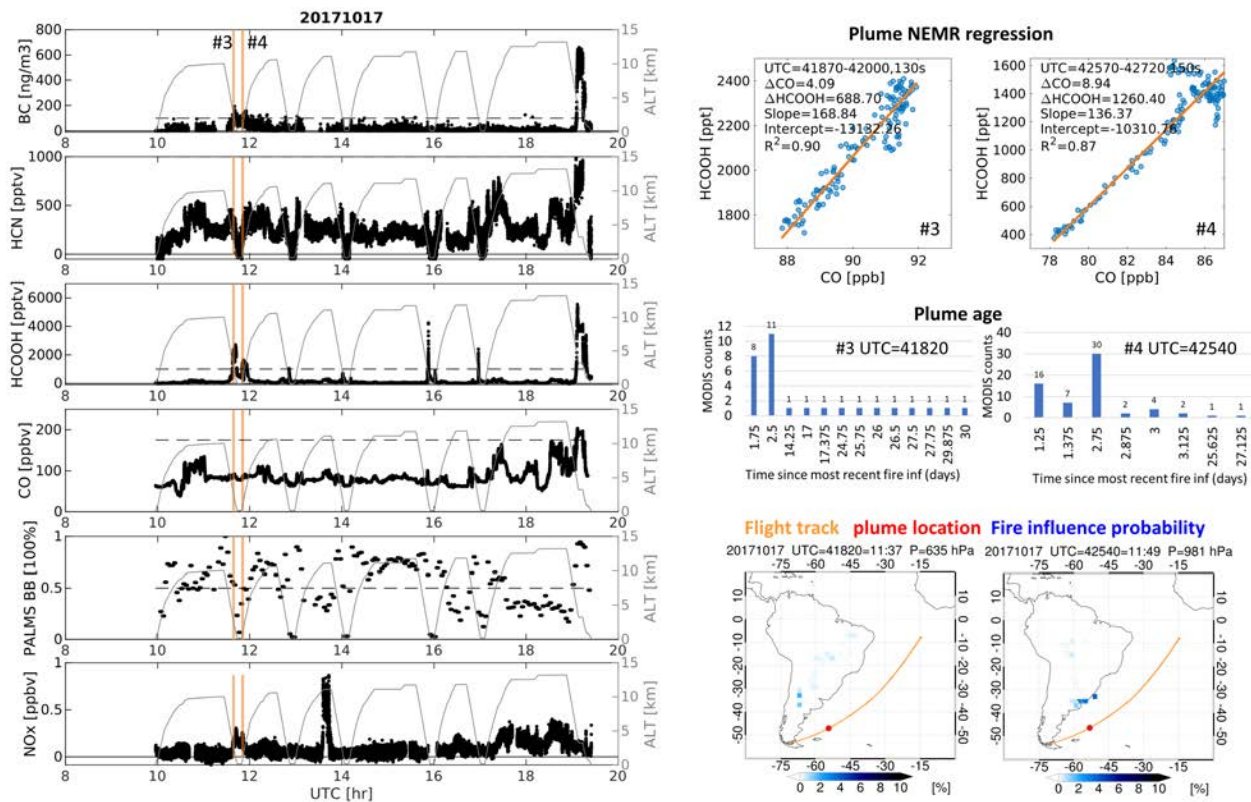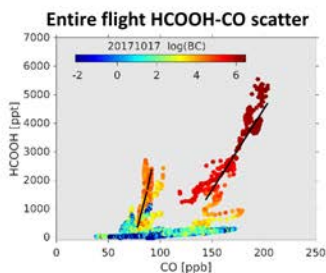



**S2.3** Other fire plume intercepts: #17 (20171025), # 18-19 (20171027), #21 (20180424), #24-27 (20180427), #28-32 (20180429), #44-46 (20180517), #47-48 (20180519), #49 (20180521)

**Plume intercept #17 (20171025):** This plume was encountered at high altitude in the Arctic. Back trajectory analysis indicates fire influence from northeast Asia. Co-enhancements for fire tracers and the PALMS BB fraction suggest significant fire influence. Classification: *fire plume*.

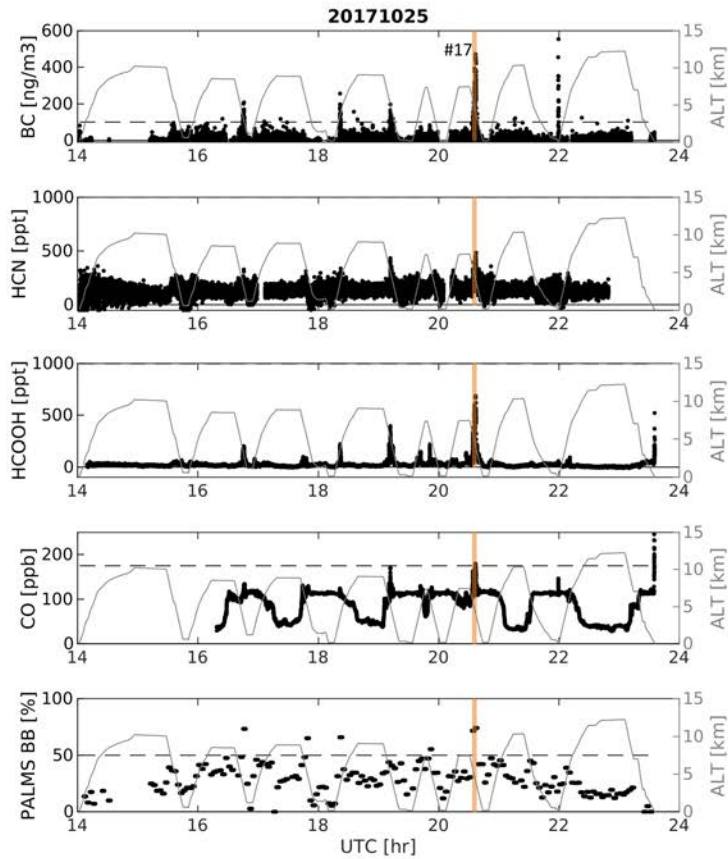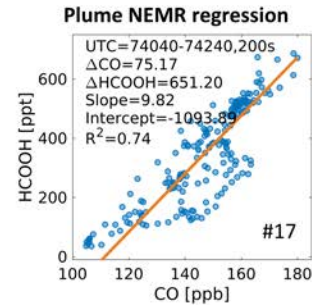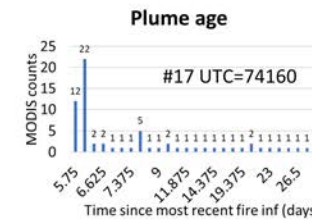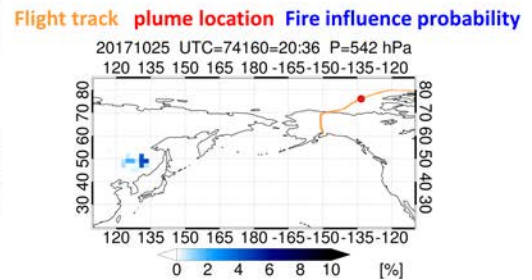

**Plume intercepts #18-19 (20171027):** These two plume intercepts were intercepted at high altitude near Alaska. Despite a lack of detected fire signal in the back trajectories, the PALMS BB fraction suggests moderate to high fire influence. Elevated levels of HCN and other fire tracers are also observed. Plume intercept #19 exhibited the highest HCN mixing ratio but lowest HCOOH NEMR seen during ATom-3 and 4. Classification: *fire plumes*.

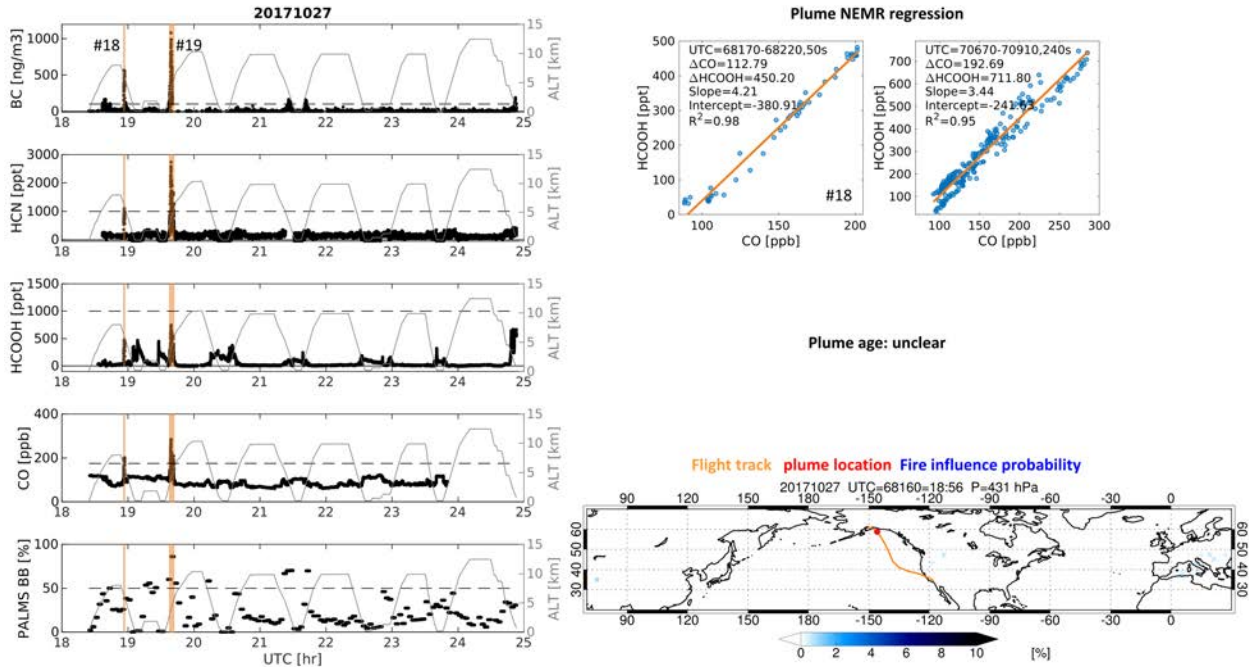

**Plume intercept #21 (20180424):** This plume was intercepted during the first equatorial flight of ATom-4. The PALMS BB fraction and many individual fire tracers point to significant fire influence. Back trajectories indicate a fire source in Central America. Classification: *fire plume*.

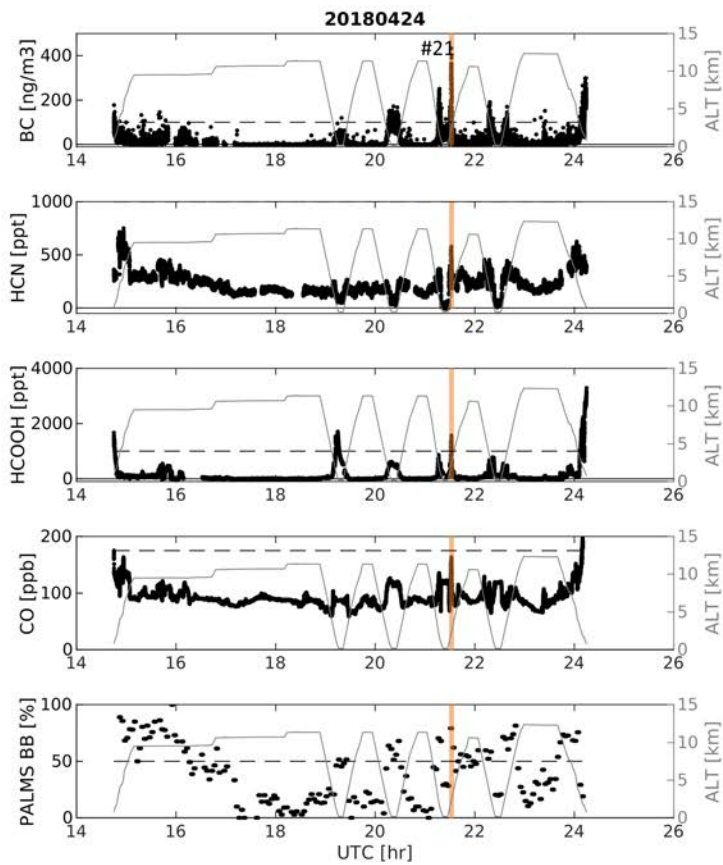

**Plume NEMR regression**

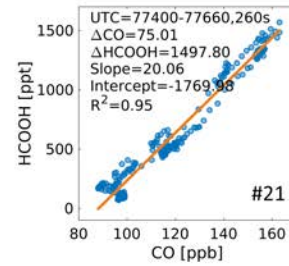

**Plume age**

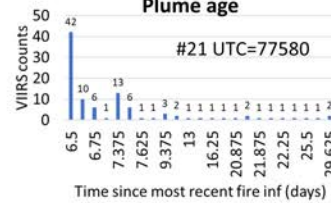

**Flight track plume location Fire influence probability**

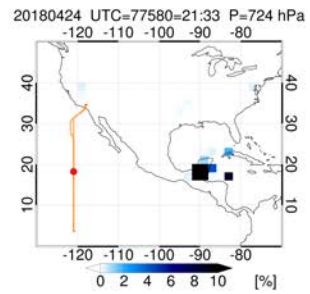

**Plume intercepts #24-27 (20180427):** These plume intercepts were intercepted during the ATom-4 flight from California to Alaska. Co-enhancements for the PALMS BB fraction and individual fire tracers (e.g., HCN) suggest that these are fire plumes. Back trajectory analysis points to a fire source in northeast Asia. Classification: *fire plumes*.

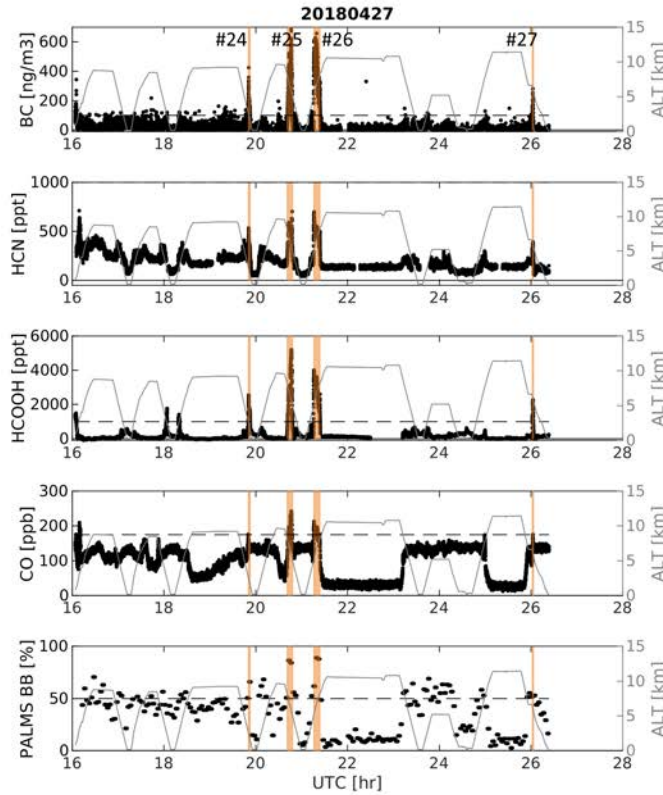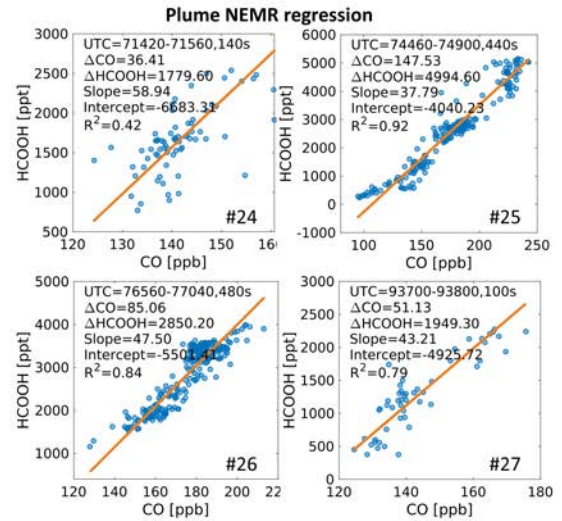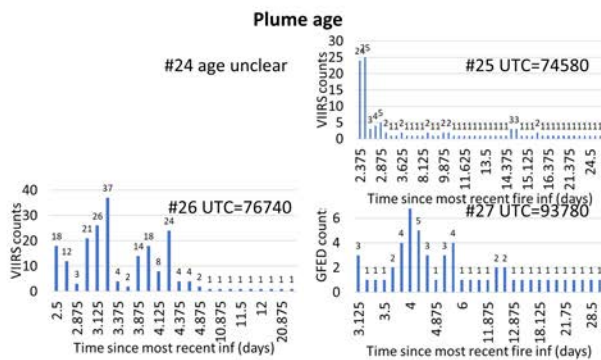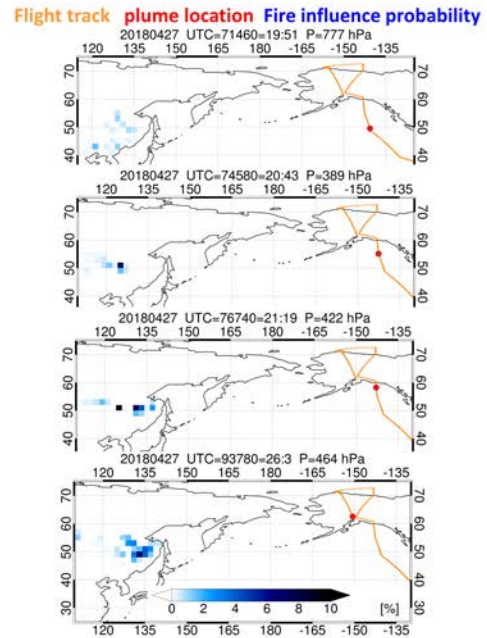

**Plume intercepts #28-32 (20180429):** These plumes were intercepted over the high-latitude Pacific. Moderate to large enhancements in the PALMS BB fraction and for individual fire tracers (e.g., HCN) indicate that these are fire plumes. Back trajectory analysis shows significant fire influence from northeast Asia for plume intercepts #28-29. Classification: *fire plumes*.

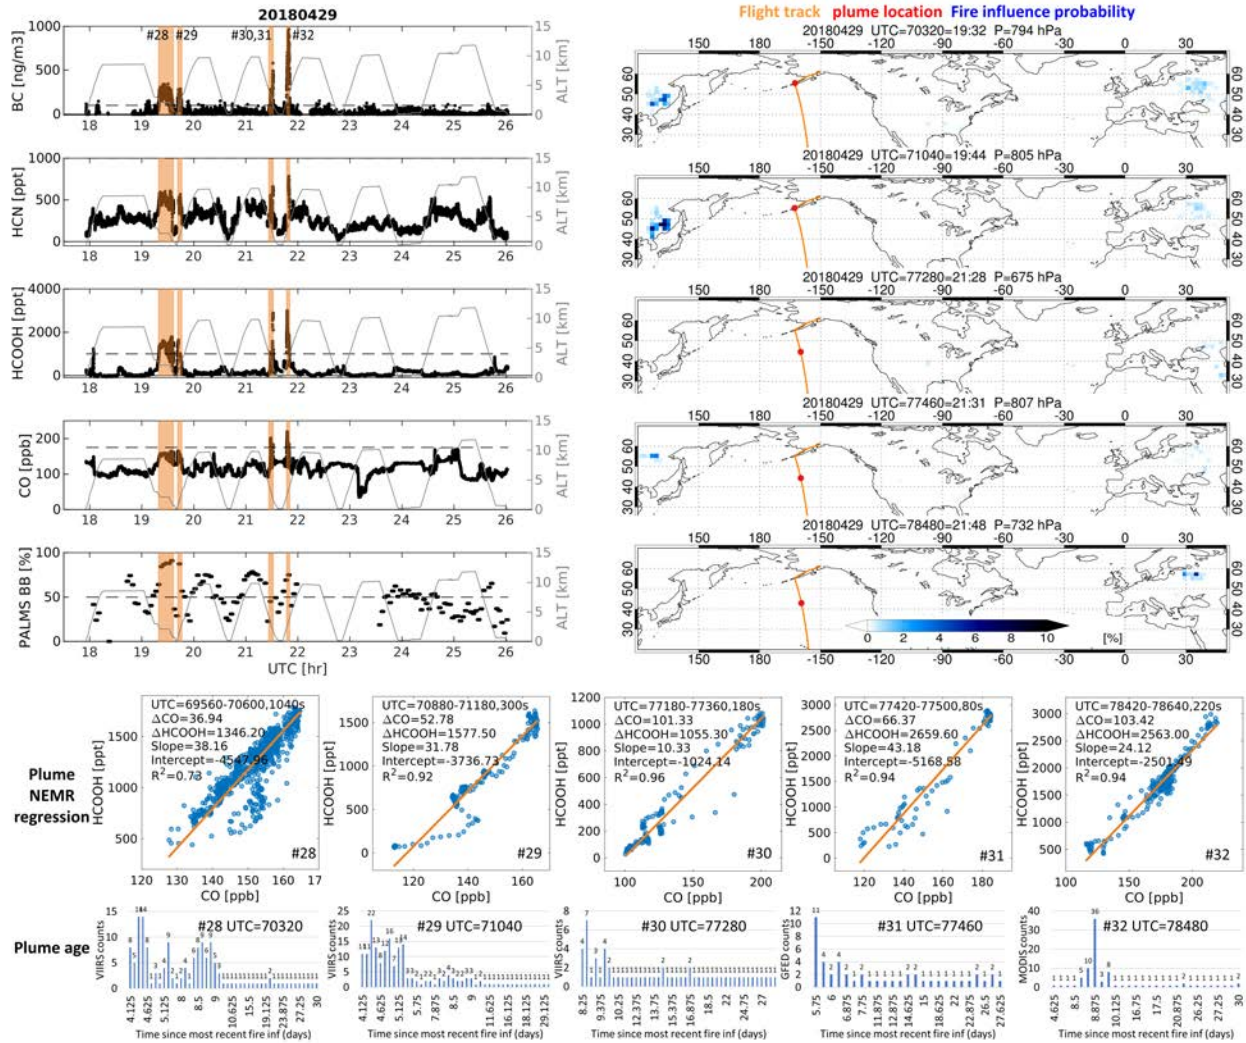

**Plume intercepts #44-46 (20180517):** These plumes were encountered at high altitude over the North Atlantic. Back trajectory analysis does not reveal any clear fire influence, but co-enhancements for fire tracers and the PALMS BB fraction suggest clear fire influence Classification: *fire plumes*.

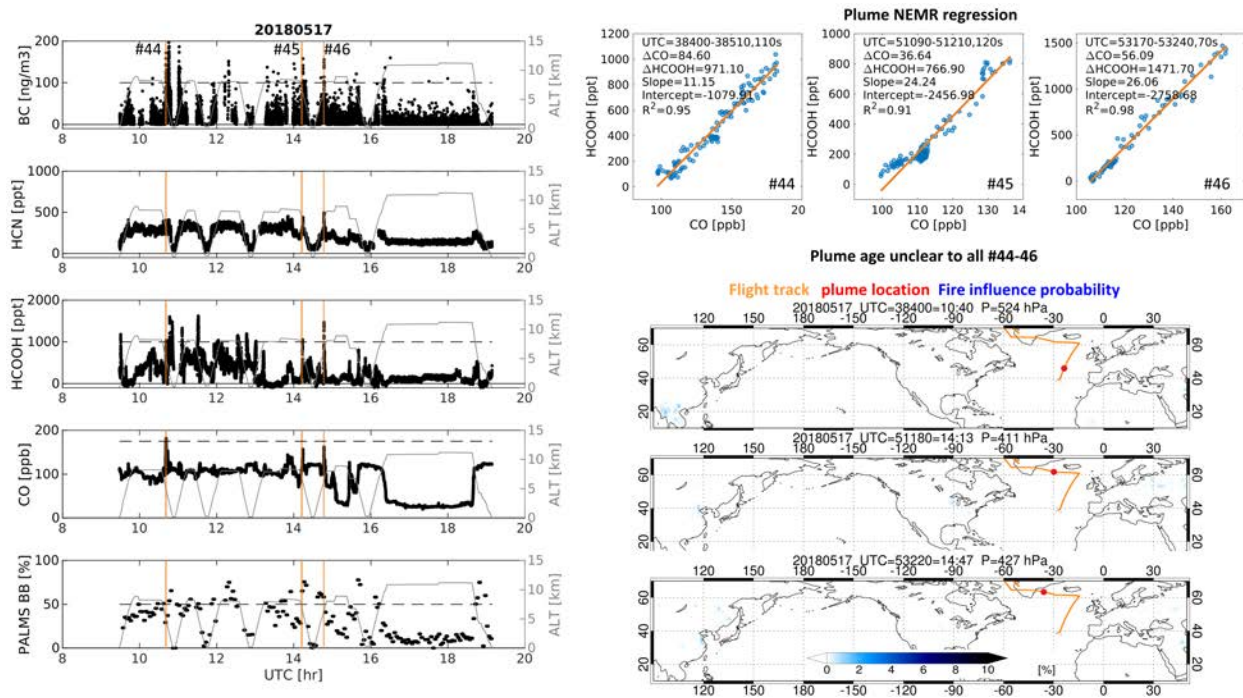

**Plume intercepts #47-48 (20180519):** These plumes were encountered over the Arctic. The PALMS BB fraction and individual fire tracers (e.g., HCN) suggest clear fire influence, with back-trajectories pointing to a source region in northeast Asia. Classification: *fire plumes*.

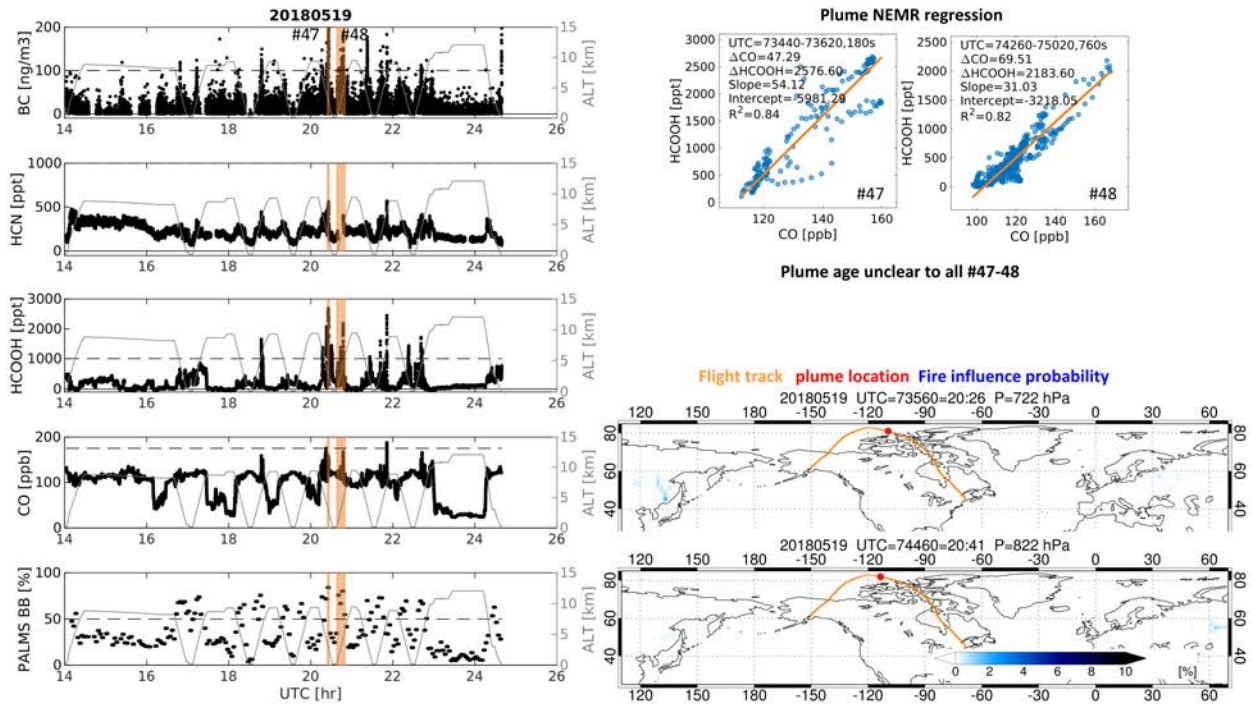

**Plume intercept #49 (20180521):** The PALMS BB fraction suggests moderate fire influence, with an east Asian origin based on back trajectory analysis. Classification: *fire plume*.

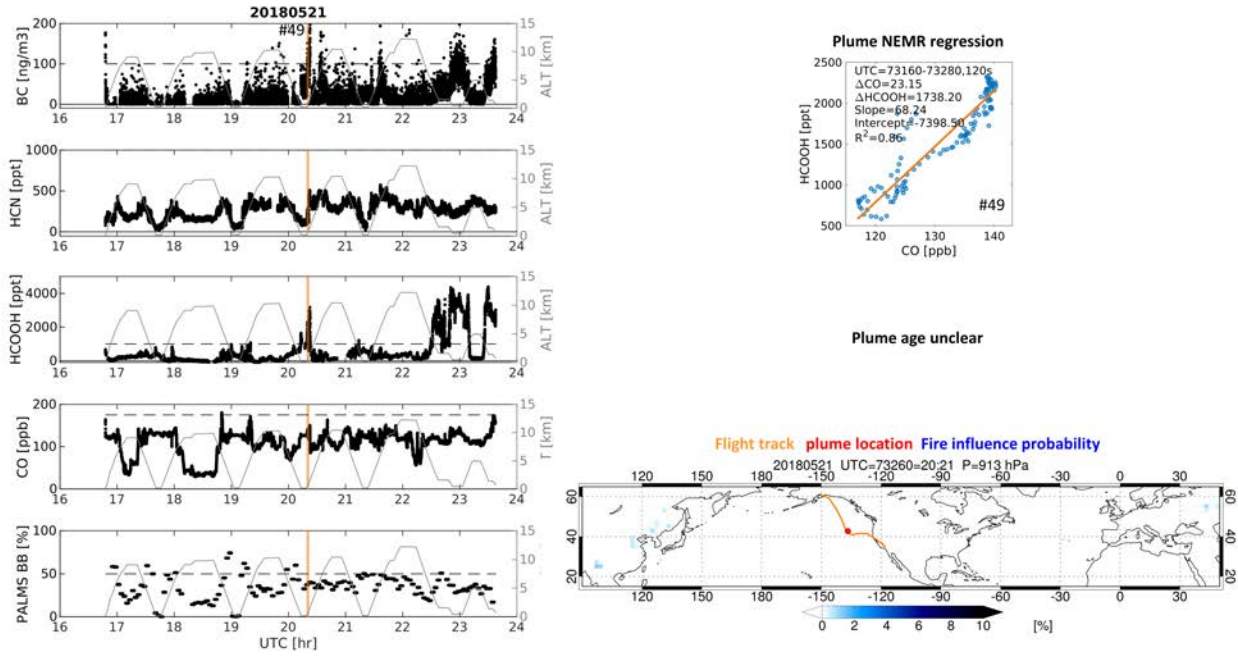



**S2.4 Other fire plume intercepts with potential urban/anthropogenic influence: #1 (20170928), #2 (20171006), #20 and #22 (20180424), #23 (20180427), #33-36 (20180503)**

**Plume intercept #1 (20170928):** The PALMS BB fraction suggests moderate fire influence. Back trajectory analysis implicates fire sources in western Canada. The observed  $\Delta BC/\Delta CO$  NEMR (3.7  $\text{ng}/\text{m}^3/\text{ppb}$ ) is consistent with reported boreal forest emission ratios (e.g., 3.7  $\text{ng}/\text{m}^3/\text{ppb}$  CO; Andreae, 2019). The plume was sampled shortly after take-off and therefore may also contain an anthropogenic contribution. Classification: *fire plume with potential urban/anthropogenic influence*.

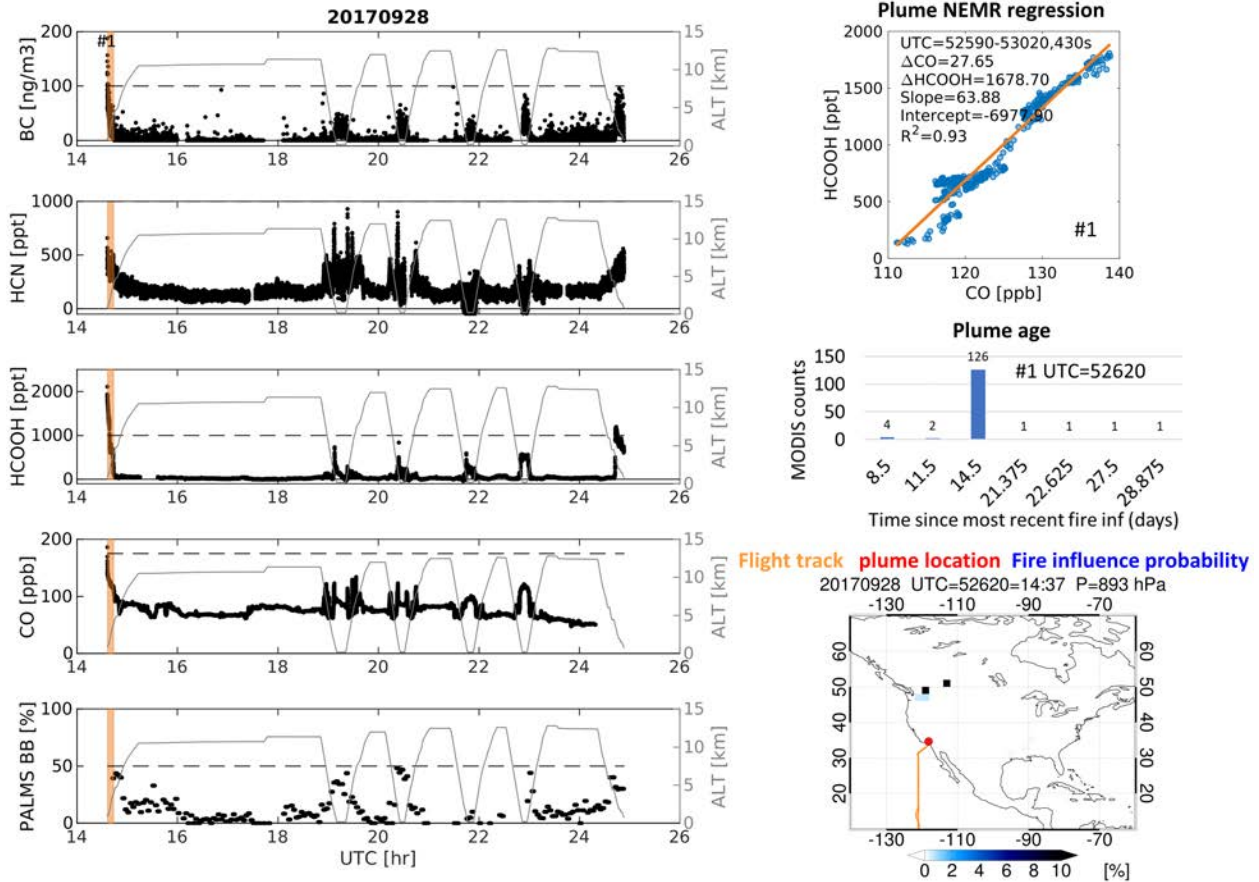

**Plume intercept #2 (20171006):** This plume was encountered prior to landing in Fiji. The PALMS BB fraction suggests moderate fire influence (~50%) in the selected time window, but strong fire influence more broadly during the final descent. Back trajectory analysis indicates significant local fire influence. Classification: *fire plume with potential urban/anthropogenic influence.*

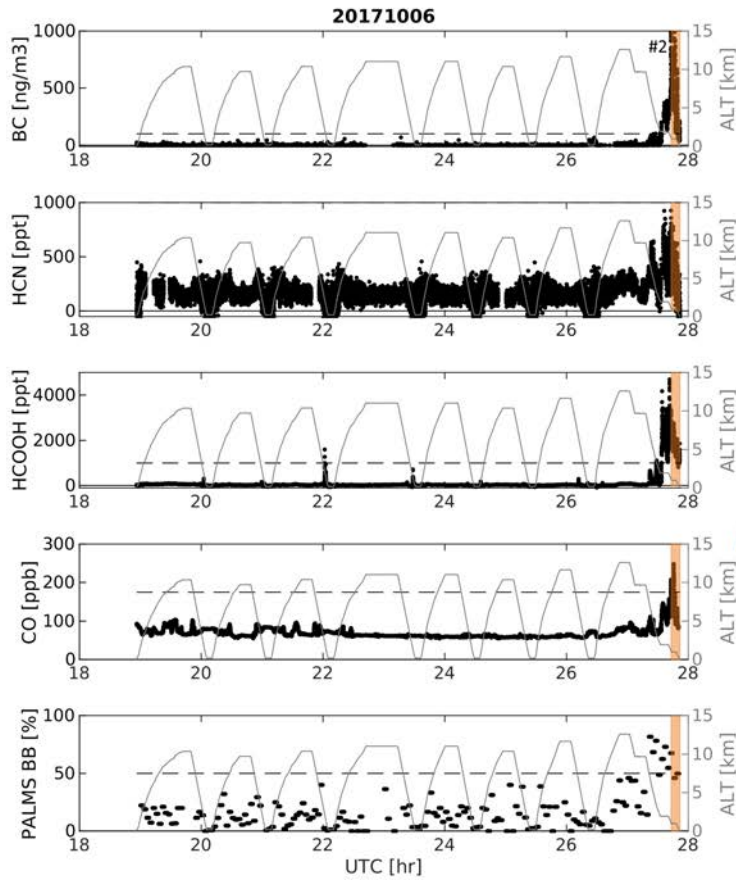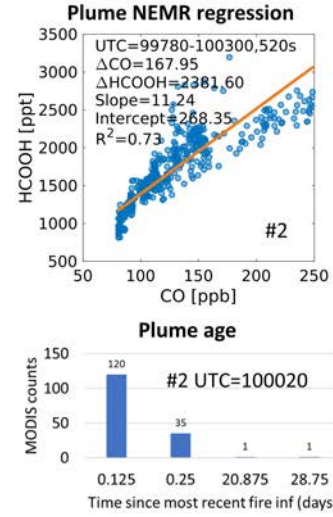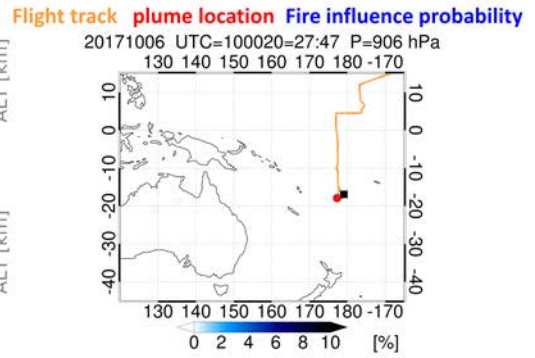

**Plume intercepts #20 and #22 (20180424):** These two plumes were sampled during take-off and landing segments over California. The PALMS BB fraction suggests low to moderate fire influence for plume intercept #22. Back trajectory analysis suggests a combined influence from California and northeast Asia fires for both plumes. Classification: *fire plumes mixed with urban/anthropogenic pollution*.

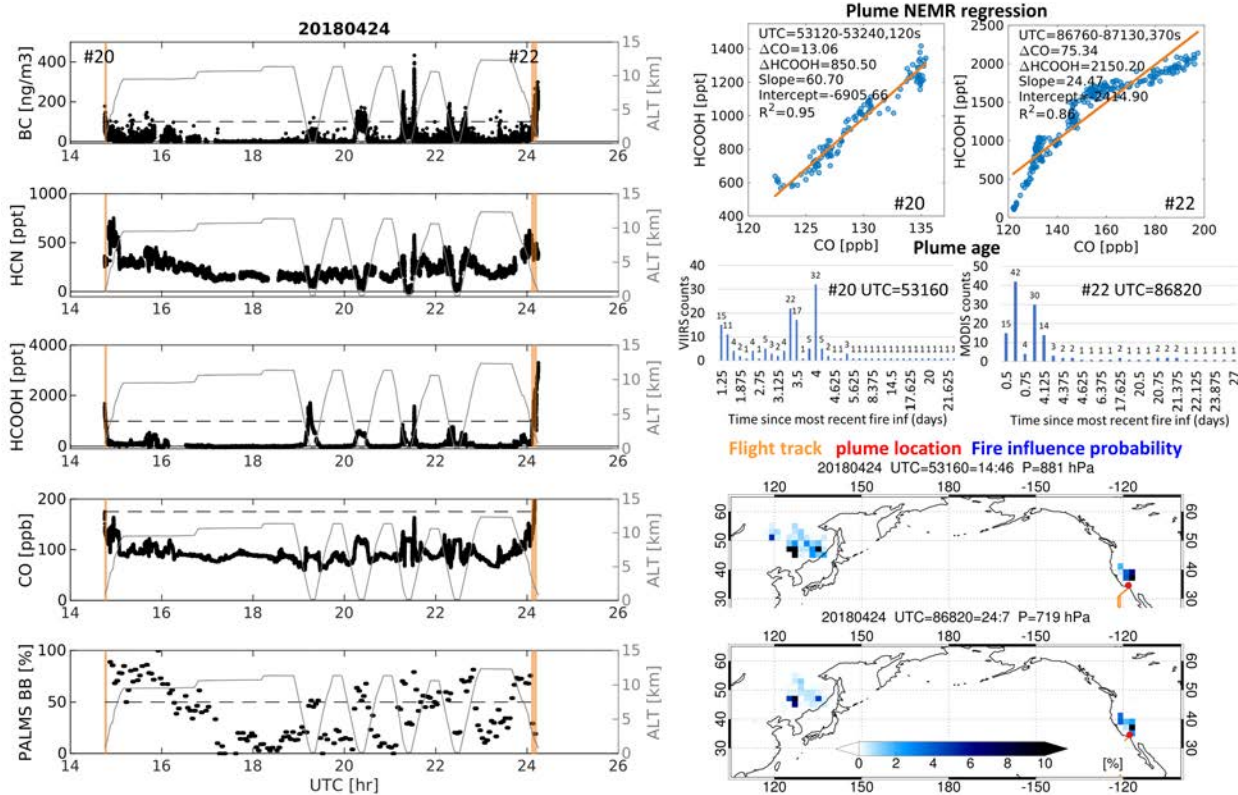

**Plume intercept #23 (20180427):** This plume was sampled shortly after takeoff from California. Fire influence is indicated by enhancements in fire tracers such as HCN. Classification: *fire plume with potential urban/anthropogenic influence.*

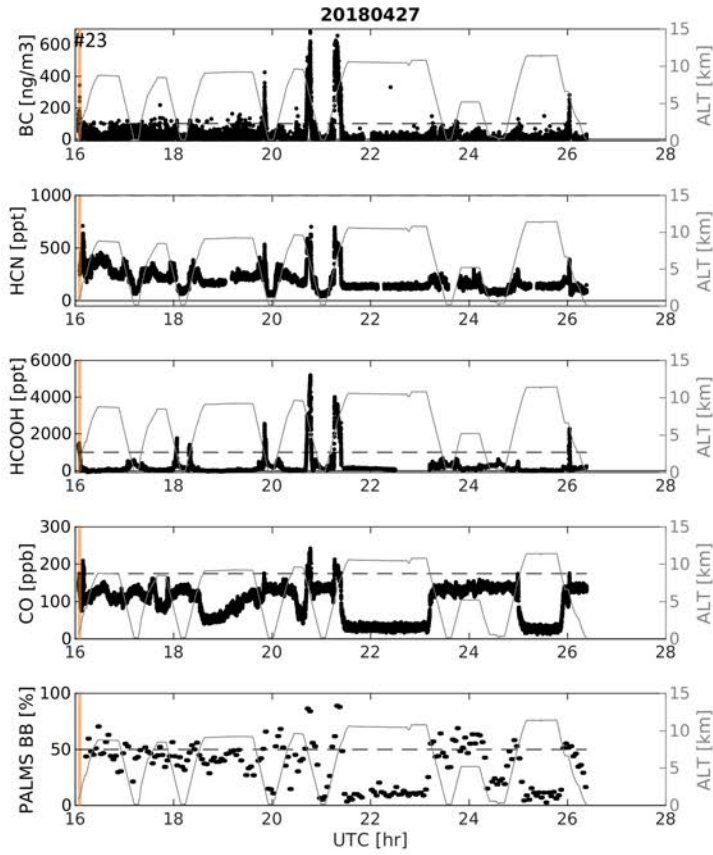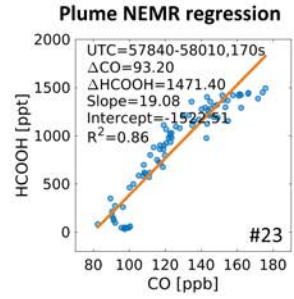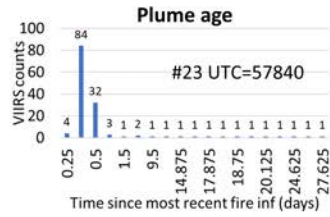

Flight track plume location Fire influence probability

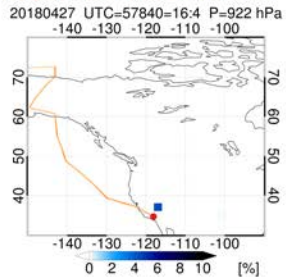

**Plume intercepts #33-36 (20180503):** This flight encountered a large pollution layer with chemical tracers exhibiting enhancements throughout the MBL (e.g., BC) or above the MBL (e.g., HCOOH). Strong fire influence is implied by the PALMS BB fraction and by back trajectory analysis. This portion of the flight is also influenced by Asian/Australian anthropogenic pollution from the free troposphere through the MBL. Classification: *fire plumes with potential urban/anthropogenic influence*.

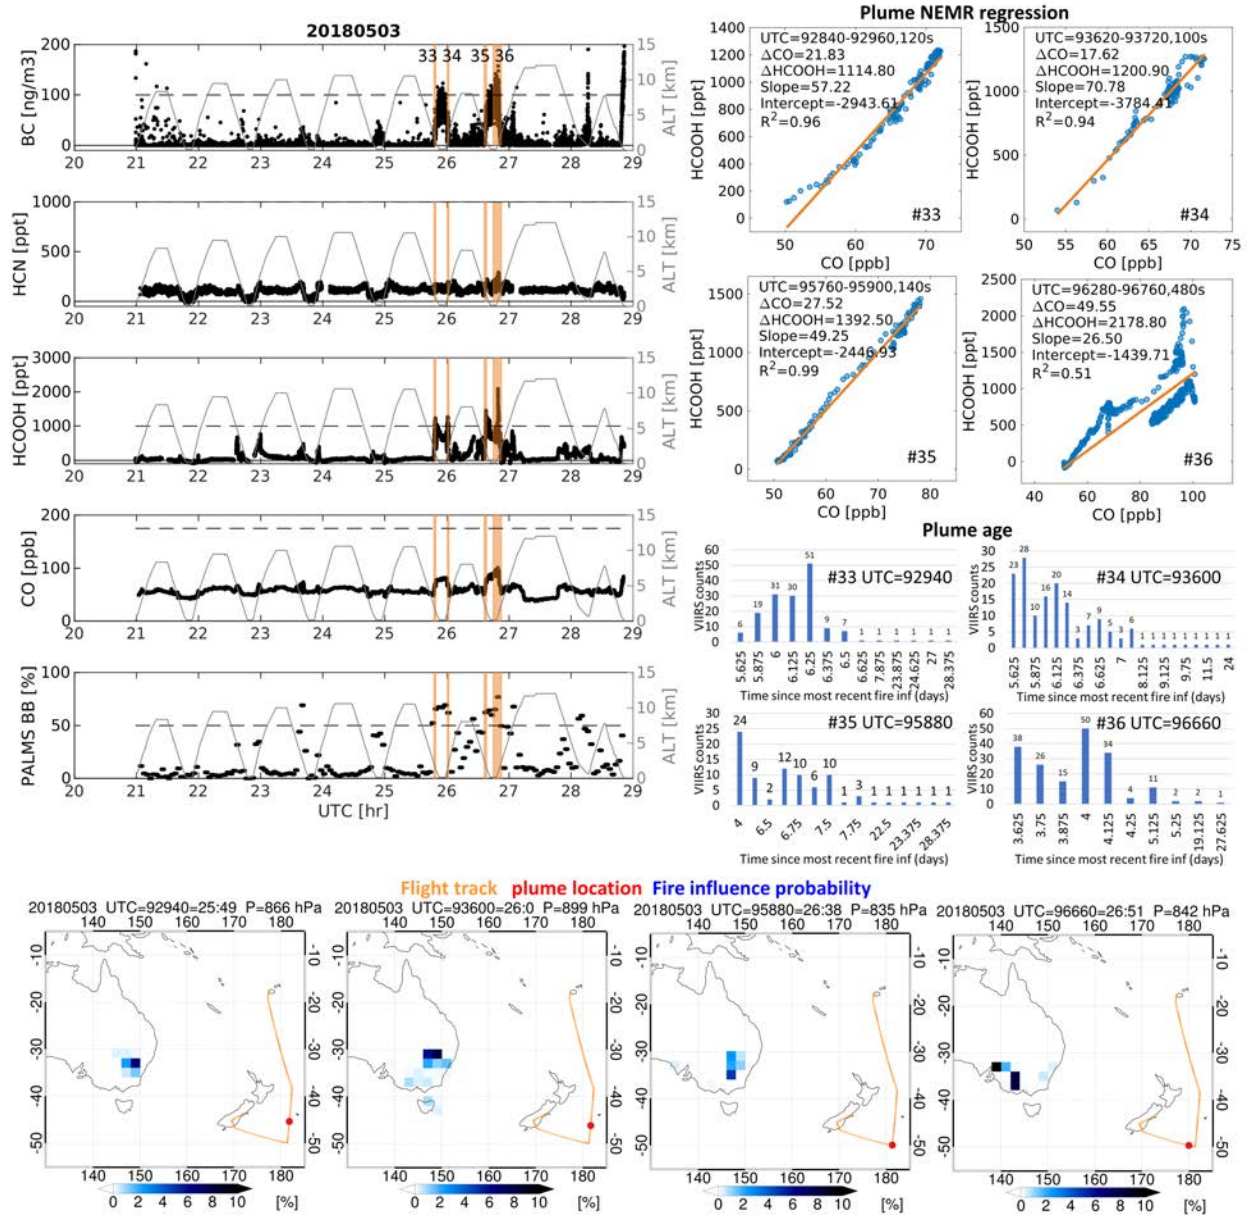

### S3. ROC related tables and figures

Tables S5 lists the species included in the ROC pie charts shown in Figures 8 and S4. Pie charts are only generated for the 21 plume intercepts with sufficient TOGA sample coverage (i.e.  $\geq 3$  datapoints) to compute NEMR values by major axis regression. Of these, 9 plume intercepts also have sufficient WAS sample coverage (also  $\geq 3$  datapoints). Inclusion of the WAS species then introduces differences in measurement coverage across the 21 plume intercepts. **Figure 8** in the main text omits VOCs only measured by WAS for consistency across plumes; **Figure S5** includes such species when available.

The resulting 21 plume intercepts (those featuring **WAS coverage in bold**) are the following: 20170928 #1, 20171006 #2, 20171017 #5, 20171019 #6, **20171019 #10**, **20171019 #11**, 20171020 #12, 20171020 #15, 20171020 #16, **20180424 #22**, 20180427 #25, 20180427 #26, **20180429 #28**, **20180503 #36**, **20180514 #37**, 20180514 #38, **20180514 #40**, 20180514 #41, **20180519 #48**, 20180521 #50, **20180521 #51**.

For a given species-plume combination, we either list the derived NEMR (in ppt C/ppb CO, correlation coefficient in parentheses), or indicate why a NEMR is not calculated (text in grey). Instrument names are abbreviated as T (TOGA), W (WAS), F (ISAF), CC (CF<sub>3</sub>O<sup>-</sup> CIMS), IC (Iodide CIMS), and H (HR-AMS). Below are a few examples to demonstrate the notation:

- **T n/a**: Species not reported by TOGA. Likewise for W n/a and F n/a.
- **W LLOD**: Species reported by WAS, but does not have enough above-detection-limit values to derive an NEMR by major axis regression. Likewise for T LLOD.
- **T NaN**: Species reported by TOGA, but lacks sufficient non-missing data values to derive an NEMR by major axis regression. Likewise for W NaN, F NaN, CC NaN, and H NaN. This mainly occurs for organic nitrate and halogen species that are not major ROC contributors in these plumes.
- **CC NEMR<0**: Species reported by CF<sub>3</sub>O<sup>-</sup> CIMS with enough valid datapoints for NEMR regression. However, the species-CO correlation is negative in the plume intercept. Likewise for T NEMR<0 and W NEMR<0.
- **H r<0.3**: Species reported by HR-AMS with enough valid datapoints for NEMR regression. However, the in-plume species-CO correlation is low ( $r<0.3$ ). Likewise for T  $r<0.3$ , W  $r<0.3$ , F  $r<0.3$ , CC  $r<0.3$ .
- **W <3 data**: Species reported by WAS but the plume window is too short to yield enough datapoints for NEMR regression.

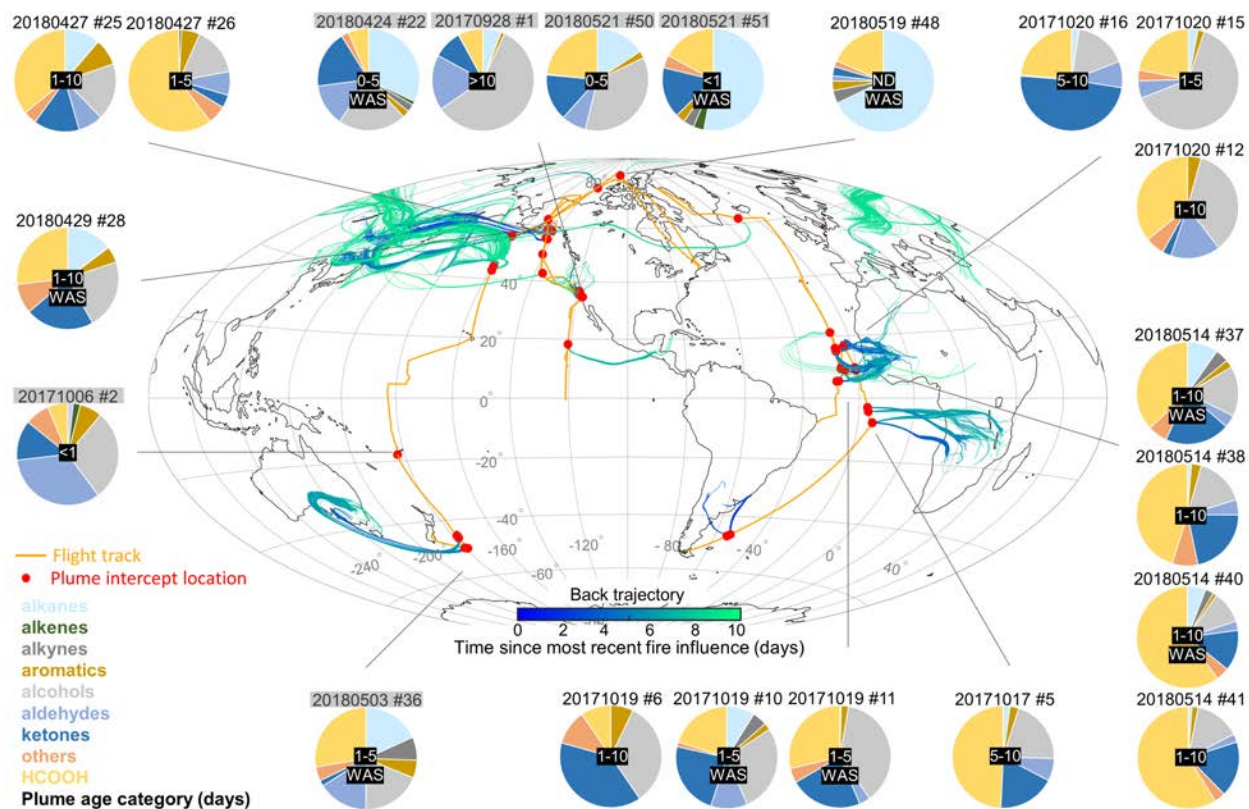

**Figure S5.** Same as **Figure 8**, but including those species measured only by WAS for the 9 plume intercepts with sufficient coverage for NEMR regression ( **Sect. S2.4**).

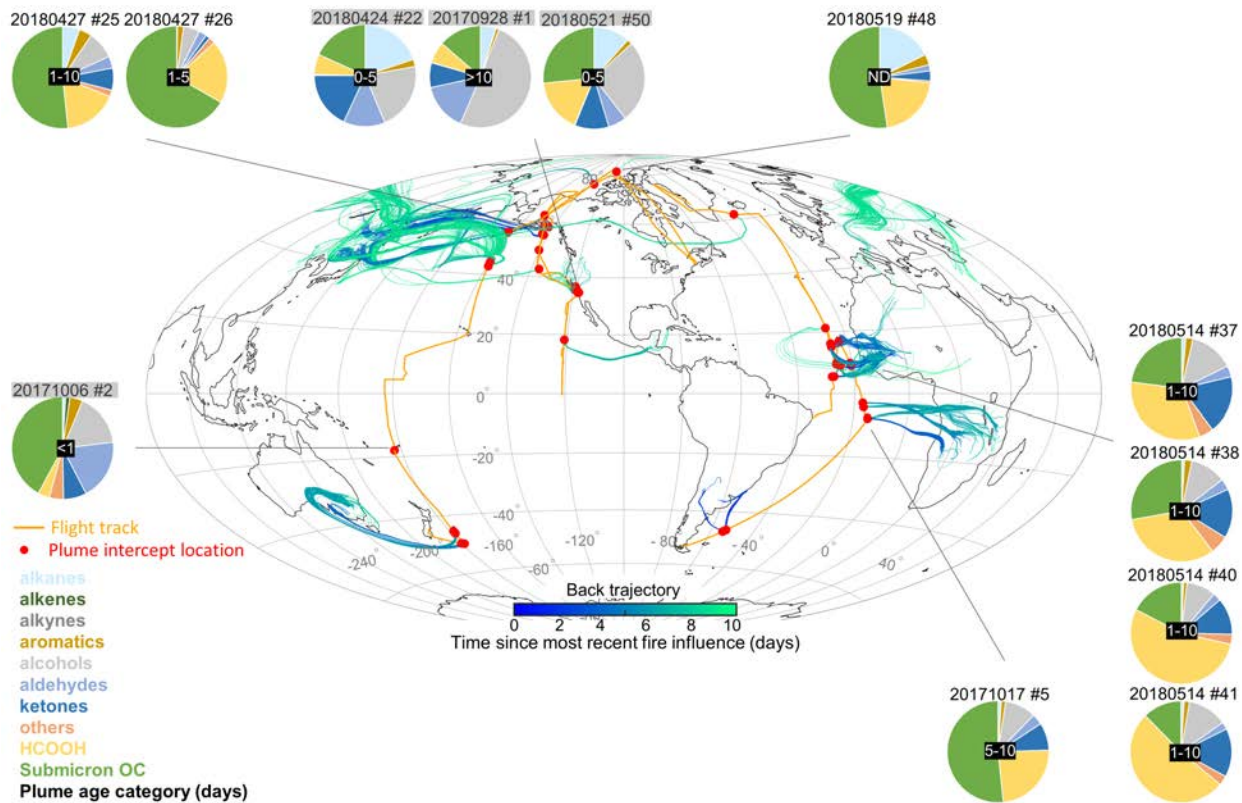

Figure S6. Same as Figure 8, but including submicron aerosol OC.



**Table S5. ROC speciation in Figures 8, S4 and S5 (ppt C/ppb CO)**

| Classes     | Plume intercept #<br>Species | 1                   | 2                   | 5                 | 6                 | 10                      | 11                   | 12                    |
|-------------|------------------------------|---------------------|---------------------|-------------------|-------------------|-------------------------|----------------------|-----------------------|
|             |                              | Alkanes             | Ethane              | T n/a, W <3 data  | T n/a, W <3 data  | T n/a, W <3 data        | T n/a, W <3 data     | T n/a, W 10.63 (0.77) |
|             | Propane                      | T 23.33 (0.98)      | T 2.66 (0.94)       | T 2.29 (0.82)     | T LLOD, W <3 data | T NEMR<0, W 2.28 (0.83) | T NEMR<0, W NEMR<0   | T NEMR<0, W <3 data   |
|             | iButane                      | T 4.55 (0.95)       | T NEMR<0, W <3 data | T 0.05 (0.88)     | T LLOD, W <3 data | T 0.79 (0.25)           | T NEMR<0, W NEMR<0   | T NEMR<0, W <3 data   |
|             | nButane                      | T 4.90 (0.81)       | T NEMR<0, W <3 data | T 0.15 (0.85)     | T LLOD, W <3 data | T 1.47 (0.39)           | T r<0.3, W NEMR<0    | T NEMR<0, W <3 data   |
|             | Isopentane                   | T 5.82 (0.99)       | T r<0.3, W <3 data  | T LLOD, W <3 data | T LLOD, W <3 data | T 0.44 (0.62)           | T 0.92 (0.34)        | T LLOD, W <3 data     |
|             | nPentane                     | T 4.30 (0.99)       | T 0.17 (0.55)       | T LLOD, W <3 data | T LLOD, W <3 data | T 0.40 (0.41)           | T LLOD, W LLOD       | T LLOD, W <3 data     |
|             | nHexane                      | T 0.87 (1.00)       | T 0.11 (0.96)       | T LLOD, W <3 data | T LLOD, W <3 data | T 0.12 (0.62)           | T LLOD, W LLOD       | T LLOD, W <3 data     |
|             | nHeptane                     | T LLOD, W <3 data   | T LLOD, W <3 data   | T LLOD, W <3 data | T LLOD, W <3 data | T LLOD, W LLOD          | T LLOD, W LLOD       | T LLOD, W <3 data     |
|             | 2Methylpentane               | T 1.42 (0.85)       | T 0.10 (0.58)       | T LLOD, W <3 data | T LLOD, W <3 data | T LLOD, W LLOD          | T LLOD, W LLOD       | T LLOD, W <3 data     |
|             | 3Methylpentane               | T LLOD, W <3 data   | T 0.04 (0.82)       | T LLOD, W <3 data | T LLOD, W <3 data | T LLOD, W LLOD          | T LLOD, W LLOD       | T LLOD, W <3 data     |
|             | 224Trimethylpentane          | T 1.09 (0.90)       | T NEMR<0, W <3 data | T LLOD, W n/a     | T LLOD, W n/a     | T LLOD, W n/a           | T LLOD, W n/a        | T LLOD, W n/a         |
| Alkenes     | Ethene                       | T n/a, W <3 data    | T n/a, W <3 data    | T n/a, W <3 data  | T n/a, W <3 data  | T n/a, W NEMR<0         | T n/a, W LLOD        | T n/a, W <3 data      |
|             | Propene                      | T n/a, W <3 data    | T n/a, W <3 data    | T n/a, W <3 data  | T n/a, W <3 data  | T n/a, W LLOD           | T n/a, W LLOD        | T n/a, W <3 data      |
|             | Isobutene+1Butene            | T 1.05 (0.36)       | T 1.38 (0.85)       | T LLOD, W n/a     | T LLOD, W n/a     | T 0.10 (0.33)           | T LLOD, W n/a        | T LLOD, W n/a         |
|             | Isoprene                     | T LLOD, W <3 data   | T r<0.3, W <3 data  | T LLOD, W <3 data | T LLOD, W <3 data | T LLOD, W LLOD          | T LLOD, W LLOD       | T LLOD, W <3 data     |
|             | aPinene                      | T LLOD, W <3 data   | T 2.63 (0.99)       | T LLOD, W n/a     | T LLOD, W n/a     | T LLOD, W n/a           | T LLOD, W n/a        | T LLOD, W n/a         |
|             | Tricyclene                   | T NEMR<0, W <3 data | T LLOD, W <3 data   | T LLOD, W n/a     | T LLOD, W n/a     | T LLOD, W n/a           | T LLOD, W n/a        | T LLOD, W n/a         |
|             | Camphene                     | T LLOD, W <3 data   | T LLOD, W <3 data   | T LLOD, W n/a     | T LLOD, W n/a     | T LLOD, W n/a           | T LLOD, W n/a        | T LLOD, W n/a         |
|             | bPineneMycene                | T LLOD, W <3 data   | T LLOD, W <3 data   | T LLOD, W n/a     | T LLOD, W n/a     | T LLOD, W n/a           | T LLOD, W n/a        | T LLOD, W n/a         |
|             | LimoneneD3Carene             | T LLOD, W <3 data   | T LLOD, W <3 data   | T LLOD, W n/a     | T LLOD, W n/a     | T LLOD, W n/a           | T LLOD, W n/a        | T LLOD, W n/a         |
| Alkynes     | Ethyne                       | T n/a, W <3 data    | T n/a, W <3 data    | T n/a, W <3 data  | T n/a, W <3 data  | T n/a, W 8.41 (0.95)    | T n/a, W 9.66 (0.59) | T n/a, W <3 data      |
| Aromatics   | Benzene                      | T 3.90 (0.97)       | T 8.82 (1.00)       | T 3.23 (1.00)     | T 13.87 (0.59)    | T 3.73 (0.95)           | T 4.80 (1.00)        | T 2.67 (0.94)         |
|             | Toluene                      | T 4.19 (0.95)       | T 2.75 (0.99)       | T LLOD, W <3 data | T 0.27 (0.89)     | T 0.29 (0.81)           | T 0.21 (0.73)        | T r<0.3, W <3 data    |
|             | Ethylbenzene                 | T LLOD, W <3 data   | T 0.36 (0.95)       | T LLOD, W <3 data | T LLOD, W <3 data | T LLOD, W LLOD          | T LLOD, W LLOD       | T LLOD, W <3 data     |
|             | mpXylene                     | T 1.13 (0.85)       | T 0.36 (0.94)       | T LLOD, W <3 data | T 0.47 (0.75)     | T LLOD, W LLOD          | T LLOD, W LLOD       | T NEMR<0, W <3 data   |
|             | oXylene                      | T LLOD, W <3 data   | T 0.13 (0.97)       | T LLOD, W <3 data | T LLOD, W <3 data | T LLOD, W LLOD          | T LLOD, W LLOD       | T LLOD, W <3 data     |
| Alcohols    | CH3OH                        | T 100.69 (0.90)     | T 24.93 (1.00)      | T 40.57 (0.78)    | T 67.73 (0.30)    | T 40.28 (0.83)          | T 81.34 (0.79)       | T 21.85 (0.78)        |
|             | C2H5OH                       | T 375.55 (0.89)     | T 25.55 (0.10)      | T 2.96 (0.30)     | T LLOD, W n/a     | T 10.34 (0.64)          | T r<0.3, W n/a       | T r<0.3, W n/a        |
| Aldehydes   | HCHO                         | F 72.31 (0.84)      | F 26.76 (0.90)      | F 5.56 (0.48)     | F r<0.3, T NEMR<0 | F 11.58 (0.78)          | F 7.67 (0.38)        | F 9.24 (0.31)         |
|             | CH3CHO                       | T 61.38 (0.90)      | T 18.53 (0.99)      | T 2.66 (0.50)     | T NEMR<0, W n/a   | T 8.36 (0.43)           | T NEMR<0, W n/a      | T r<0.3, W n/a        |
|             | Propanal                     | T LLOD, W n/a       | T 2.87 (0.88)       | T LLOD, W n/a     | T LLOD, W n/a     | T 0.80 (0.90)           | T LLOD, W n/a        | T NaN, W n/a          |
|             | Butanal                      | T 4.86 (0.99)       | T 0.37 (0.78)       | T NEMR<0, W n/a   | T NEMR<0, W n/a   | T 0.57 (0.28)           | T NEMR<0, W n/a      | T 0.59 (0.40)         |
|             | Acrolein                     | T LLOD, W n/a       | T 6.00 (0.97)       | T LLOD, W n/a     | T LLOD, W n/a     | T LLOD, W n/a           | T LLOD, W n/a        | T LLOD, W n/a         |
|             | Methacrolein                 | T 4.17 (0.91)       | T 3.99 (0.95)       | T LLOD, W n/a     | T LLOD, W n/a     | T LLOD, W n/a           | T LLOD, W n/a        | T LLOD, W n/a         |
| Ketones     | Acetone                      | T 51.81 (1.00)      | T 11.13 (0.94)      | T 19.44 (0.82)    | T 79.06 (0.86)    | T 37.59 (0.88)          | T 44.41 (0.68)       | T NaN, W n/a          |
|             | MEK                          | T 11.60 (1.00)      | T 1.63 (1.00)       | T 1.47 (0.95)     | T r<0.3, W n/a    | T 4.99 (0.74)           | T 5.65 (0.51)        | T 1.71 (0.44)         |
|             | MVK                          | T 10.79 (0.88)      | T 9.49 (0.97)       | T LLOD, W n/a     | T LLOD, W n/a     | T r<0.3, W n/a          | T LLOD, W n/a        | T LLOD, W n/a         |
| Other OVOCs | MTBE                         | T LLOD, W n/a       | T LLOD, W <3 data   | T LLOD, W n/a     | T LLOD, W n/a     | T LLOD, W n/a           | T LLOD, W n/a        | T LLOD, W n/a         |
| Other VOCs  | OCS                          | T n/a, W <3 data    | T n/a, W <3 data    | T n/a, W <3 data  | T n/a, W <3 data  | T n/a, W NEMR<0         | T n/a, W 2.4 (0.63)  | T n/a, W <3 data      |
|             | DMS                          | T LLOD, W <3 data   | T LLOD, W <3 data   | T LLOD, W <3 data | T LLOD, W <3 data | T LLOD, W LLOD          | T LLOD, W LLOD       | T LLOD, W <3 data     |
|             | HCN                          | CC r<0.3, T r<0.3   | CC 8.15 (0.59)      | CC r<0.3, T r<0.3 | CC 15.21 (0.42)   | CC r<0.3, T r<0.3       | CC NEMR<0, T r<0.3   | CC NaN, T 2.12 (0.70) |
|             | CH3CN                        | T 1.32 (0.93)       | T 3.49 (0.96)       | T r<0.3, W n/a    | T 6.57 (0.65)     | T 1.99 (0.50)           | T 4.33 (0.94)        | T 1.66 (0.95)         |

Table S5. Continued

| Classes          | Plume intercept #     | 1                   | 2                   | 5                   | 6                   | 10                      | 11                   | 12                   |
|------------------|-----------------------|---------------------|---------------------|---------------------|---------------------|-------------------------|----------------------|----------------------|
|                  | Species               |                     |                     |                     |                     |                         |                      |                      |
| Organic nitrates | Methyl nitrate        | T n/a, W <3 data    | T n/a, W 0.03 (0.57)    | T n/a, W 0.02 (0.37) | T n/a, W <3 data     |
|                  | Ethyl nitrate         | T NaN, W <3 data    | T NaN, W 0.03 (0.94)    | T NaN, W r<0.3       | T NaN, W <3 data     |
|                  | Isopropyl nitrate     | T NEMR<0, W <3 data | T LLOD, W <3 data   | T r<0.3, W <3 data  | T LLOD, W <3 data   | T 0.09 (0.50)           | T r<0.3, W NEMR<0    | T LLOD, W <3 data    |
|                  | nPropyl nitrate       | T n/a, W <3 data    | T n/a, W 0.01 (0.98)    | T n/a, W NEMR<0      | T n/a, W <3 data     |
|                  | 2Butyl nitrate        | T n/a, W <3 data    | T n/a, W 0.11 (0.68)    | T n/a, W NEMR<0      | T n/a, W <3 data     |
|                  | 3Pentyl nitrate       | T n/a, W <3 data    | T n/a W 0.07 (0.99)     | T n/a, W 0.05 (0.87) | T n/a, W <3 data     |
|                  | 2Pentyl nitrate       | T n/a, W <3 data    | T n/a, W 0.09 (0.98)    | T n/a, W 0.04 (0.85) | T n/a, W <3 data     |
|                  | 3Methyl2butyl nitrate | T n/a, W <3 data    | T n/a, W 0.05 (1.00)    | T n/a, W 0.04 (0.66) | T n/a, W <3 data     |
|                  | Halogens              | CFC12               | T n/a, W <3 data        | T n/a, W 0.21 (0.12) | T n/a, W 0.58 (0.92) |
| CFC11            |                       | T n/a, W <3 data    | T n/a, W NEMR<0         | T n/a, W 0.20 (0.67) | T n/a, W <3 data     |
| CFC113           |                       | T NaN, W <3 data    | T NaN, W 0.02 (0.88)    | T NaN, W 0.13 (0.53) | T NaN, W <3 data     |
| CFC114           |                       | T n/a, W <3 data    | T n/a, W 0.01 (0.59)    | T n/a, W 0.04 (0.47) | T n/a, W <3 data     |
| HFC152a          |                       | T n/a, W <3 data    | T n/a, W NaN            | T n/a, W NaN         | T n/a, W <3 data     |
| HFC134a          |                       | T n/a, W <3 data    | T n/a, W 0.10 (0.83)    | T n/a, W 0.45 (0.96) | T n/a, W <3 data     |
| HFC365mfc        |                       | T n/a, W <3 data    | T n/a, W NaN            | T n/a, W NaN         | T n/a, W <3 data     |
| HCFC124          |                       | T n/a, W <3 data    | T n/a, W NaN            | T n/a, W NaN         | T n/a, W <3 data     |
| HCFC22           |                       | T n/a, W <3 data    | T n/a, W 0.03 (0.41)    | T n/a, W 0.40 (0.91) | T n/a, W <3 data     |
| HCFC142b         |                       | T n/a, W <3 data    | T n/a, W 0.05 (0.64)    | T n/a, W r<0.3       | T n/a, W <3 data     |
| HCFC141b         |                       | T n/a, W <3 data    | T n/a, W 0.03 (0.53)    | T n/a, W 0.07 (0.64) | T n/a, W <3 data     |
| H1301            |                       | T n/a, W <3 data    | T n/a, W NEMR<0         | T n/a, W 0.01 (0.41) | T n/a, W <3 data     |
| H2402            |                       | T n/a, W <3 data    | T n/a, W NEMR<0         | T n/a, W 0.00 (0.68) | T n/a, W <3 data     |
| H1211            |                       | T n/a, W <3 data    | T n/a, W NEMR<0         | T n/a, W 0.01 (0.56) | T n/a, W <3 data     |
| CH3CCl3          |                       | T n/a, W <3 data    | T n/a, W 0.00 (0.54)    | T n/a, W r<0.3       | T n/a, W <3 data     |
| CCl4             |                       | T n/a, W <3 data    | T n/a, W NEMR<0         | T n/a, W 0.07 (0.99) | T n/a, W <3 data     |
| CHCl3            |                       | T NEMR<0, W <3 data | T NEMR<0, W <3 data | T r<0.3, W <3 data  | T 0.21 (0.65)       | T 0.03 (0.34)           | T r<0.3, W NEMR<0    | T 0.03 (0.44)        |
| CH2Cl2           |                       | T NEMR<0, W <3 data | T 2.07 (0.86)       | T NEMR<0, W <3 data | T 0.74 (0.99)       | T r<0.3, W NEMR<0       | T r<0.3, W NEMR<0    | T NEMR<0, W <3 data  |
| C2Cl4            |                       | T NEMR<0, W <3 data | T 0.01 (0.95)       | T NEMR<0, W <3 data | T r<0.3, W n/a      | T NEMR<0, W 0.01 (0.65) | T r<0.3, W r<0.3     | T NEMR<0, W <3 data  |
| CH3Cl            |                       | T NaN, W <3 data    | T NaN, W r<0.3          | T NaN, W 1.17 (0.98) | T NaN, W <3 data     |
| CH3Br            |                       | T NaN, W <3 data    | T NaN, W NEMR<0         | T NaN, W NEMR<0      | T NaN, W <3 data     |
| CH3I             |                       | T 0.00 (0.63)       | T 0.00 (0.76)       | T r<0.3, W <3 data  | T r<0.3, W <3 data  | T 0.03 (0.32)           | T 0.02 (0.52)        | T NaN, W <3 data     |
| CH2Br2           |                       | T NEMR<0, W <3 data | T 0.00 (0.79)       | T NEMR<0, W <3 data | T NEMR<0, W <3 data | T r<0.3, W r<0.3        | T r<0.3, W NEMR<0    | T NEMR<0, W <3 data  |
| CHBrCl2          |                       | T LLOD, W <3 data   | T NEMR<0, W <3 data | T LLOD, W <3 data   | T LLOD, W <3 data   | T NEMR<0, W r<0.3       | T LLOD, W r<0.3      | T LLOD, W <3 data    |
| CHBr2Cl          |                       | T NEMR<0, W <3 data | T r<0.3, W <3 data  | T LLOD, W <3 data   | T LLOD, W <3 data   | T NEMR<0, W r<0.3       | T LLOD, W NEMR<0     | T LLOD, W <3 data    |
| CHBr3            |                       | T NEMR<0, W <3 data | T NEMR<0, W <3 data | T LLOD, W <3 data   | T LLOD, W <3 data   | T r<0.3, W r<0.3        | T r<0.3, W NEMR<0    | T r<0.3, W <3 data   |
| CH2ClCH2Cl       |                       | T n/a, W <3 data    | T n/a, W r<0.3          | T n/a, W r<0.3       | T n/a, W <3 data     |
| ClBenzene        |                       | T NEMR<0, W <3 data | T r<0.3, W <3 data  | T LLOD, W <3 data   | T LLOD, W n/a       | T NEMR<0, W n/a         | T LLOD, W n/a        | T LLOD, W n/a        |
| CH2ClI           |                       | T LLOD, W <3 data   | T LLOD, W <3 data   | T LLOD, W <3 data   | T LLOD, W n/a       | T LLOD, W n/a           | T LLOD, W n/a        | T LLOD, W n/a        |
| CH2BrI           |                       | T LLOD, W <3 data   | T LLOD, W <3 data   | T LLOD, W <3 data   | T LLOD, W n/a       | T LLOD, W n/a           | T LLOD, W n/a        | T LLOD, W n/a        |
| CH2I2            | T LLOD, W <3 data     | T LLOD, W <3 data   | T LLOD, W <3 data   | T LLOD, W n/a       | T LLOD, W n/a       | T LLOD, W n/a           | T LLOD, W n/a        |                      |
| HCOOH            | HCOOH                 | IC 63.88 (0.93)     | IC 11.24 (0.73)     | IC 56.74 (0.75)     | IC 19.48 (0.76)     | IC 36.57 (0.93)         | IC 62.53 (0.78)      | IC 22.23 (0.90)      |
| OC               | OC                    | H 128.75 (0.70)     | H 127.71 (0.93)     | H 123.13 (0.88)     | H NaN               | H r<0.3                 | H r<0.3              | H r<0.3              |

Table S5. Continued

| Classes      | Species             | Plume intercept #   |                     |                       |                      |                      |                        |                         |
|--------------|---------------------|---------------------|---------------------|-----------------------|----------------------|----------------------|------------------------|-------------------------|
|              |                     | 15                  | 16                  | 22                    | 25                   | 26                   | 28                     | 36                      |
| Alkanes      | Ethane              | T n/a, W <3 data    | T n/a, W <3 data    | T n/a, W 46.05 (1.00) | T n/a, W <3 data     | T n/a, W <3 data     | T n/a, W 19.24 (0.61)  | T n/a, W 10.28 (1.00)   |
|              | Propane             | T NEMR<0, W <3 data | T NEMR<0, W <3 data | T 22.49 (1.00)        | T 6.26 (0.77)        | T r<0.3, W <3 data   | T r<0.3, W r<0.3       | T 2.53 (0.95)           |
|              | iButane             | T 1.33 (0.77)       | T 1.29 (0.75)       | T 8.62 (0.99)         | T 1.24 (0.89)        | T r<0.3, W <3 data   | T NEMR<0, W R<0.3      | T 0.72 (0.89)           |
|              | nButane             | T 2.32 (0.51)       | T 1.84 (0.59)       | T 12.53 (1.00)        | T 2.30 (0.94)        | T r<0.3, W <3 data   | T NEMR<0, W R<0.3      | T 1.26 (0.96)           |
|              | Isopentane          | T LLOD, W <3 data   | T LLOD, W <3 data   | T 15.49 (1.00)        | T 0.81 (0.95)        | T r<0.3, W <3 data   | T r<0.3, W 1.05 (0.39) | T 1.90 (1.00)           |
|              | nPentane            | T LLOD, W <3 data   | T LLOD, W <3 data   | T 4.95 (1.00)         | T 0.78 (0.80)        | T r<0.3, W <3 data   | T r<0.3, W NEMR<0      | T 0.76 (0.92)           |
|              | nHexane             | T LLOD, W <3 data   | T LLOD, W <3 data   | T 1.54 (0.98)         | T 0.11 (0.99)        | T r<0.3, W <3 data   | T 0.23 (0.31)          | T LLOD, W LLOD          |
|              | nHeptane            | T LLOD, W <3 data   | T LLOD, W <3 data   | T LLOD, W LLOD        | T LLOD, W <3 data    | T LLOD, W <3 data    | T LLOD, W LLOD         | T LLOD, W LLOD          |
|              | 2Methylpentane      | T LLOD, W <3 data   | T LLOD, W <3 data   | T 4.22 (0.99)         | T r<0.3, W <3 data   | T LLOD, W <3 data    | T LLOD, W LLOD         | T LLOD, W LLOD          |
|              | 3Methylpentane      | T LLOD, W <3 data   | T LLOD, W <3 data   | T 1.28 (1.00)         | T 0.05 (0.31)        | T LLOD, W <3 data    | T LLOD, W LLOD         | T LLOD, W LLOD          |
|              | 224Trimethylpentane | T LLOD, W n/a       | T LLOD, W n/a       | T 4.07 (0.99)         | T LLOD, W <3 data    | T LLOD, W <3 data    | T LLOD, W n/a          | T LLOD, W n/a           |
| Alkenes      | Ethene              | T n/a, W <3 data    | T n/a, W <3 data    | T n/a, W 3.90 (0.94)  | T n/a, W <3 data     | T n/a, W <3 data     | T n/a, W NEMR<0        | T n/a, W LLOD           |
|              | Propene             | T n/a, W <3 data    | T n/a, W <3 data    | T n/a, W 0.34 (1.00)  | T n/a, W <3 data     | T n/a, W <3 data     | T n/a, W LLOD          | T n/a, W LLOD           |
|              | Isobutene+1Butene   | T LLOD, W n/a       | T LLOD, W n/a       | T LLOD, W n/a         | T 0.16 (0.40)        | T NEMR<0, W n/a      | T NEMR<0, W n/a        | T LLOD, W n/a           |
|              | Isoprene            | T LLOD, W <3 data   | T LLOD, W <3 data   | T LLOD, W LLOD        | T LLOD, W <3 data    | T LLOD, W <3 data    | T LLOD, W LLOD         | T LLOD, W LLOD          |
|              | aPinene             | T LLOD, W n/a       | T LLOD, W n/a       | T LLOD, W n/a         | T LLOD, W <3 data    | T LLOD, W n/a        | T LLOD, W n/a          | T LLOD, W n/a           |
|              | Tricyclene          | T LLOD, W n/a       | T LLOD, W n/a       | T LLOD, W n/a         | T LLOD, W <3 data    | T 0.66 (0.30)        | T 0.37 (0.53)          | T LLOD, W n/a           |
|              | Camphene            | T LLOD, W n/a       | T LLOD, W n/a       | T LLOD, W n/a         | T LLOD, W n/a        | T LLOD, W n/a        | T LLOD, W n/a          | T LLOD, W n/a           |
|              | bPineneMycene       | T LLOD, W n/a       | T LLOD, W n/a       | T LLOD, W n/a         | T LLOD, W <3 data    | T LLOD, W n/a        | T LLOD, W n/a          | T LLOD, W n/a           |
|              | LimoneneD3Carene    | T LLOD, W n/a       | T LLOD, W n/a       | T LLOD, W n/a         | T LLOD, W <3 data    | T LLOD, W n/a        | T LLOD, W n/a          | T LLOD, W n/a           |
|              | Alkynes             | Ethyne              | T n/a, W <3 data    | T n/a, W <3 data      | T n/a, W 9.43 (0.98) | T n/a, W <3 data     | T n/a, W <3 data       | T n/a, W 8.78 (0.92)    |
| Aromatics    | Benzene             | T 2.21 (0.87)       | T NEMR<0, W <3 data | T 4.06 (1.00)         | T 7.50 (0.98)        | T 4.95 (0.93)        | T 7.20 (0.62)          | T 4.16 (1.00)           |
|              | Toluene             | T 0.18 (1.00)       | T 0.00 (1.00)       | T 4.42 (0.98)         | T 1.13 (1.00)        | T 0.91 (0.21)        | T r<0.3, W LLOD        | T 1.20 (0.97)           |
|              | Ethylbenzene        | T LLOD, W <3 data   | T LLOD, W <3 data   | T LLOD, W LLOD        | T 0.16 (0.99)        | T LLOD, W <3 data    | T LLOD, W LLOD         | T LLOD, W LLOD          |
|              | mpXylene            | T LLOD, W <3 data   | T LLOD, W <3 data   | T LLOD, W LLOD        | T LLOD, W <3 data    | T LLOD, W <3 data    | T NEMR<0, W LLOD       | T LLOD, W LLOD          |
|              | oXylene             | T LLOD, W <3 data   | T LLOD, W <3 data   | T LLOD, W LLOD        | T LLOD, W <3 data    | T LLOD, W <3 data    | T LLOD, W LLOD         | T 0.05 (0.98)           |
| Alcohols     | CH3OH               | T 57.65 (0.44)      | T r<0.3, W n/a      | T 45.03 (0.74)        | T 17.02 (0.95)       | T 13.11 (0.68)       | T 31.37 (0.41)         | T 18.08 (0.34)          |
|              | C2H5OH              | T 18.10 (0.46)      | T 21.41 (0.72)      | T 36.58 (1.00)        | T 1.79 (1.00)        | T 0.97 (0.02)        | T r<0.3, W n/a         | T NEMR<0, W n/a         |
| Aldehydes    | HCHO                | F 6.66 (0.67)       | F 9.90 (0.48)       | F 29.16 (0.96)        | F 2.28 (0.45)        | F NaN, T 1.57 (0.90) | F r<0.3, TOGA r<0.3    | F 10.37 (0.70)          |
|              | CH3CHO              | T NEMR<0, W n/a     | T r<0.3, W n/a      | T 18.39 (1.00)        | T 5.65 (0.98)        | T 4.06 (0.40)        | T r<0.3, W n/a         | T 4.58 (0.99)           |
|              | Propanal            | T LLOD, W n/a       | T LLOD, W n/a       | T 1.27 (0.35)         | T NEMR<0, W <3 data  | T NEMR<0, W n/a      | T r<0.3, W n/a         | T LLOD, W n/a           |
|              | Butanal             | T NEMR<0, W n/a     | T 0.88 (0.90)       | T 0.61 (0.87)         | T 0.24 (1.00)        | T 0.73 (0.50)        | T NEMR<0, W n/a        | T 0.34 (0.96)           |
|              | Acrolein            | T LLOD, W n/a       | T LLOD, W n/a       | T LLOD, W n/a         | T LLOD, W <3 data    | T LLOD, W n/a        | T LLOD, W n/a          | T LLOD, W n/a           |
| Methacrolein | T LLOD, W n/a       | T LLOD, W n/a       | T 0.71 (0.80)       | T LLOD, W <3 data     | T LLOD, W n/a        | T LLOD, W n/a        | T LLOD, W n/a          |                         |
| Ketones      | Acetone             | T r<0.3, W n/a      | T 53.48 (0.75)      | T 57.38 (0.96)        | T 10.58 (0.27)       | T r<0.3, W n/a       | T 27.08 (0.34)         | T r<0.3, W n/a          |
|              | MEK                 | T r<0.3, W n/a      | T 8.97 (0.99)       | T 9.31 (1.00)         | T 4.53 (0.99)        | T 3.48 (0.86)        | T 3.66 (0.33)          | T 1.74 (0.61)           |
|              | MVK                 | T LLOD, W n/a       | T LLOD, W n/a       | T 1.92 (0.80)         | T LLOD, W <3 data    | T LLOD, W n/a        | T LLOD, W n/a          | T LLOD, W n/a           |
| Other OVOCs  | MTBE                | T LLOD, W n/a       | T LLOD, W n/a       | T LLOD, W n/a         | T 0.08 (0.40)        | T NEMR<0, W n/a      | T 1.06 (0.53)          | T LLOD, W n/a           |
| Other VOCs   | OCS                 | T n/a, W <3 data    | T n/a, W <3 data    | T n/a, W NEMR<0       | T n/a, W <3 data     | T n/a, W <3 data     | T n/a, W NEMR<0        | T n/a, W NEMR<0         |
|              | DMS                 | T LLOD, W <3 data   | T LLOD, W <3 data   | T LLOD, W LLOD        | T LLOD, W <3 data    | T LLOD, W <3 data    | T LLOD, W LLOD         | T LLOD, W LLOD          |
|              | HCN                 | CC r<0.3, T NEMR<0  | CC r<0.3, T NEMR<0  | CC NEMR<0, T NEMR<0   | CC 3.52 (0.59)       | CC 4.94 (0.64)       | CC 8.49 (0.47)         | CC r<0.3, T 1.84 (0.75) |
|              | CH3CN               | T 3.46 (0.89)       | T NEMR<0, W n/a     | T NEMR<0, W n/a       | T 0.72 (0.46)        | T NEMR<0, W n/a      | T 2.18 (0.47)          | T r<0.3, W n/a          |

Table S5. Continued

| Classes          | Plume intercept#<br>Species | 15                  | 16                  | 22                    | 25                   | 26                  | 28                      | 36                    |                 |
|------------------|-----------------------------|---------------------|---------------------|-----------------------|----------------------|---------------------|-------------------------|-----------------------|-----------------|
| Organic nitrates | Methyl nitrate              | T n/a, W <3 data    | T n/a, W <3 data    | T n/a, W 0.05 (0.97)  | T n/a, W <3 data     | T n/a, W <3 data    | T n/a, W r<0.3          | T n/a, W 0.37 (0.94)  |                 |
|                  | Ethyl nitrate               | T NaN, W <3 data    | T NaN, W <3 data    | T LLOD, W 0.08 (0.99) | T NaN, W <3 data     | T NaN, W <3 data    | T NaN, W 0.05 (0.64)    | T NaN, W 0.11 (0.98)  |                 |
|                  | Isopropyl nitrate           | T LLOD, W <3 data   | T 0.26 (0.71)       | T 0.42 (0.90)         | T 0.07 (0.42)        | T 0.06 (0.42)       | T r<0.3, W 0.12 (0.62)  | T 0.25 (0.39)         |                 |
|                  | nPropyl nitrate             | T n/a, W <3 data    | T n/a, W <3 data    | T n/a, W 0.05 (1.00)  | T n/a, W <3 data     | T n/a, W <3 data    | T n/a, W r<0.3          | T n/a, W 0.02 (1.00)  |                 |
|                  | 2Butyl nitrate              | T n/a, W <3 data    | T n/a, W <3 data    | T n/a, W 0.52 (1.00)  | T n/a, W <3 data     | T n/a, W <3 data    | T n/a, W 0.23 (0.41)    | T n/a, W 0.08 (1.00)  |                 |
|                  | 3Pentyl nitrate             | T n/a, W <3 data    | T n/a, W <3 data    | T n/a, W 0.28 (1.00)  | T n/a, W <3 data     | T n/a, W <3 data    | T n/a, W 0.13 (0.65)    | T n/a, W 0.04 (0.85)  |                 |
|                  | 2Pentyl nitrate             | T n/a, W <3 data    | T n/a, W <3 data    | T n/a, W 0.48 (0.99)  | T n/a, W <3 data     | T n/a, W <3 data    | T n/a, W 0.20 (0.30)    | T n/a, W 0.06 (0.93)  |                 |
|                  | 3Methyl2butyl nitrate       | T n/a, W <3 data    | T n/a, W <3 data    | T n/a, W 0.67 (1.00)  | T n/a, W <3 data     | T n/a, W <3 data    | T n/a, W r<0.3          | T n/a, W 0.05 (1.00)  |                 |
|                  | Halogens                    | CFC12               | T n/a, W <3 data    | T n/a, W <3 data      | T n/a, W 0.07 (0.79) | T n/a, W <3 data    | T n/a, W <3 data        | T n/a, W NEMR<0       | T n/a, W NEMR<0 |
| CFC11            |                             | T n/a, W <3 data    | T n/a, W <3 data    | T n/a, W 0.02 (0.81)  | T n/a, W <3 data     | T n/a, W <3 data    | T n/a, W NEMR<0         | T n/a, W NEMR<0       |                 |
| CFC113           |                             | T NaN, W <3 data    | T NaN, W <3 data    | T NaN, W 0.02 (0.99)  | T NaN, W <3 data     | T NaN, W <3 data    | T NaN, W NEMR<0         | T NaN, W 0.02 (0.54)  |                 |
| CFC114           |                             | T n/a, W <3 data    | T n/a, W <3 data    | T n/a, W r<0.3        | T n/a, W <3 data     | T n/a, W <3 data    | T n/a, W r<0.3          | T n/a, W 0.02 (0.76)  |                 |
| HFC152a          |                             | T n/a, W <3 data    | T n/a, W <3 data    | T n/a, W 2.27 (1.00)  | T n/a, W <3 data     | T n/a, W <3 data    | T n/a, W NEMR<0         | T n/a, W r<0.3        |                 |
| HFC134a          |                             | T n/a, W <3 data    | T n/a, W <3 data    | T n/a, W 2.03 (0.98)  | T n/a, W <3 data     | T n/a, W <3 data    | T n/a, W NaN            | T n/a, W r<0.3        |                 |
| HFC365mfc        |                             | T n/a, W <3 data    | T n/a, W <3 data    | T n/a, W NaN          | T n/a, W <3 data     | T n/a, W <3 data    | T n/a, W NaN            | T n/a, W NaN          |                 |
| HCFC124          |                             | T n/a, W <3 data    | T n/a, W <3 data    | T n/a, W NaN          | T n/a, W <3 data     | T n/a, W <3 data    | T n/a, W NaN            | T n/a, W NaN          |                 |
| HCFC22           |                             | T n/a, W <3 data    | T n/a, W <3 data    | T n/a, W 1.08 (0.93)  | T n/a, W <3 data     | T n/a, W <3 data    | T n/a, W NEMR<0         | T n/a, W r<0.3        |                 |
| HCFC142b         |                             | T n/a, W <3 data    | T n/a, W <3 data    | T n/a, W 0.06 (0.83)  | T n/a, W <3 data     | T n/a, W <3 data    | T n/a, W r<0.3          | T n/a, W NEMR<0       |                 |
| HCFC141b         |                             | T n/a, W <3 data    | T n/a, W <3 data    | T n/a, W 0.18 (0.87)  | T n/a, W <3 data     | T n/a, W <3 data    | T n/a, W NEMR<0         | T n/a, W NEMR<0       |                 |
| H1301            |                             | T n/a, W <3 data    | T n/a, W <3 data    | T n/a, W r<0.3        | T n/a, W <3 data     | T n/a, W <3 data    | T n/a, W NEMR<0         | T n/a, W NEMR<0       |                 |
| H2402            |                             | T n/a, W <3 data    | T n/a, W <3 data    | T n/a, W 0.00 (0.56)  | T n/a, W <3 data     | T n/a, W <3 data    | T n/a, W 0.00 (0.80)    | T n/a, W NaN          |                 |
| H1211            |                             | T n/a, W <3 data    | T n/a, W <3 data    | T n/a, W 0.01 (0.94)  | T n/a, W <3 data     | T n/a, W <3 data    | T n/a, W NEMR<0         | T n/a, W NEMR<0       |                 |
| CH3CCI3          |                             | T n/a, W <3 data    | T n/a, W <3 data    | T n/a, W 0.01 (0.99)  | T n/a, W <3 data     | T n/a, W <3 data    | T n/a, W r<0.3          | T n/a, W r<0.3        |                 |
| CCl4             |                             | T n/a, W <3 data    | T n/a, W <3 data    | T n/a, W 0.03 (0.94)  | T n/a, W <3 data     | T n/a, W <3 data    | T n/a, W NEMR<0         | T n/a, W NEMR<0       |                 |
| CHCl3            |                             | T 0.19 (0.80)       | T 0.10 (0.99)       | T 0.09 (0.99)         | T 0.04 (0.87)        | T NEMR<0, W <3 data | T r<0.3, W 0.20 (0.65)  | T 0.07 (1.00)         |                 |
| CH2Cl2           |                             | T 0.38 (0.76)       | T 0.47 (0.99)       | T 0.36 (0.78)         | T NEMR<0, W <3 data  | T NEMR<0, W <3 data | T NEMR<0, W 0.17 (0.42) | T 0.06 (0.98)         |                 |
| C2Cl4            |                             | T NEMR<0, W <3 data | T r<0.3, W <3 data  | T 0.11 (0.99)         | T 0.00 (0.84)        | T NEMR<0, W <3 data | T r<0.3, W r<0.3        | T 0.01 (0.46)         |                 |
| CH3Cl            |                             | T NaN, W <3 data    | T NaN, W <3 data    | T NaN, W NEMR<0       | T NaN, W <3 data     | T NaN, W <3 data    | T NaN, W NEMR<0         | T NaN, W 1.24 (0.65)  |                 |
| CH3Br            |                             | T NaN, W <3 data    | T NaN, W <3 data    | T NaN, W 0.01 (0.62)  | T NaN, W <3 data     | T NaN, W <3 data    | T NaN, W r<0.3          | T NaN, W 0.02 (0.67)  |                 |
| CH3I             |                             | T 0.03 (0.69)       | T NEMR<0, W <3 data | T 0.00 (0.84)         | T r<0.3, W <3 data   | T 0.01 (0.70)       | T NEMR<0, W r<0.3       | T 0.01 (0.82)         |                 |
| CH2Br2           |                             | T 0.01 (1.00)       | T NEMR<0, W <3 data | T 0.00 (0.91)         | T 0.00 (0.99)        | T NEMR<0, W <3 data | T NEMR<0, W r<0.3       | T 0.02 (0.77)         |                 |
| CHBrCl2          |                             | T NaN, W <3 data    | T LLOD, W <3 data   | T LLOD, W 0.01 (1.00) | T LLOD, W <3 data    | T LLOD, W <3 data   | T LLOD, W 0.00 (0.38)   | T LLOD, W 0.00 (0.86) |                 |
| CHBr2Cl          |                             | T LLOD, W <3 data   | T LLOD, W <3 data   | T LLOD, W 0.01 (1.00) | T LLOD, W <3 data    | T LLOD, W <3 data   | T LLOD, W 0.00 (0.37)   | T LLOD, W 0.00 (0.81) |                 |
| CHBr3            |                             | T r<0.3, W <3 data  | T 0.02 (1.00)       | T LLOD, W 0.02 (0.98) | T LLOD, W <3 data    | T 0.01 (0.66)       | T NEMR<0, W r<0.3       | T 0.01 (0.60)         |                 |
| CH2ClCH2Cl       |                             | T n/a, W <3 data    | T n/a, W <3 data    | T n/a, W NEMR<0       | T n/a, W <3 data     | T n/a, W <3 data    | T n/a, W 0.62 (0.40)    | T n/a, W NEMR<0       |                 |
| ClBenzene        |                             | T LLOD, W n/a       | T LLOD, W n/a       | T 0.01 (1.00)         | T LLOD, W n/a        | T 0.01 (0.58)       | T NEMR<0, W n/a         | T NEMR<0, W n/a       |                 |
| CH2ClI           |                             | T LLOD, W n/a       | T LLOD, W n/a       | T LLOD, W n/a         | T LLOD, W n/a        | T LLOD, W n/a       | T LLOD, W n/a           | T LLOD, W n/a         |                 |
| CH2BrI           |                             | T LLOD, W n/a       | T LLOD, W n/a       | T LLOD, W n/a         | T LLOD, W n/a        | T LLOD, W n/a       | T LLOD, W n/a           | T LLOD, W n/a         |                 |
| CH2I2            |                             | T LLOD, W n/a       | T LLOD, W n/a       | T LLOD, W n/a         | T LLOD, W n/a        | T LLOD, W n/a       | T LLOD, W n/a           | T LLOD, W n/a         |                 |
| HCOOH            |                             | HCOOH               | IC 26.06 (0.91)     | IC 30.03 (0.74)       | IC 24.47 (0.86)      | IC 37.28 (0.82)     | IC 51.33 (0.79)         | IC 38.16 (0.74)       | IC 26.50 (0.51) |
| OC               |                             | OC                  | H r<0.3             | H r<0.3               | H 68.88 (0.90)       | H 111.60 (0.59)     | H 170.06 (0.66)         | H r<0.3               | H r<0.3         |

Table S5. Continued

| Classes           | Species             | Plume intercept#      |                      |                      |                      |                       |                      |                       |                       |
|-------------------|---------------------|-----------------------|----------------------|----------------------|----------------------|-----------------------|----------------------|-----------------------|-----------------------|
|                   |                     | 37                    | 38                   | 40                   | 41                   | 48                    | 50                   | 51                    |                       |
| Alkanes           | Ethane              | T n/a, W 10.75 (1.00) | T n/a, W <3 data     | T n/a, W 9.38 (0.91) | T n/a, W <3 data     | T n/a, W 87.84 (0.40) | T n/a, W <3 data     | T n/a, W 70.75 (0.84) |                       |
|                   | Propane             | T 1.39 (0.98)         | T 1.20 (1.00)        | T 1.30 (0.67)        | T 1.92 (0.99)        | T 19.19 (0.36)        | T 22.56 (0.98)       | T 37.55 (0.47)        |                       |
|                   | iButane             | T 0.18 (0.99)         | T 0.12 (0.94)        | T 0.11 (0.88)        | T 0.25 (0.98)        | T 2.93 (0.56)         | T 6.35 (0.97)        | T 26.38 (0.69)        |                       |
|                   | nButane             | T 0.38 (0.99)         | T 0.27 (0.92)        | T 0.14 (0.57)        | T 0.41 (0.98)        | T 4.32 (0.58)         | T 8.43 (1.00)        | T 8.80 (0.90)         |                       |
|                   | Isopentane          | T LLOD, W LLOD        | T LLOD, W <3 data    | T LLOD, W LLOD       | T LLOD, W <3 data    | T LLOD, W LLOD        | T 14.30 (1.00)       | T 11.52 (0.88)        |                       |
|                   | nPentane            | T LLOD, W LLOD        | T LLOD, W <3 data    | T LLOD, W LLOD       | T LLOD, W <3 data    | T LLOD, W LLOD        | T LLOD, W <3 data    | T 3.40 (0.90)         |                       |
|                   | nHexane             | T LLOD, W LLOD        | T LLOD, W <3 data    | T LLOD, W LLOD       | T LLOD, W <3 data    | T LLOD, W LLOD        | T LLOD, W <3 data    | T 3.16 (0.80)         |                       |
|                   | nHeptane            | T LLOD, W LLOD        | T LLOD, W <3 data    | T LLOD, W LLOD       | T LLOD, W <3 data    | T LLOD, W LLOD        | T LLOD, W <3 data    | T 0.50 (0.65)         |                       |
|                   | 2Methylpentane      | T LLOD, W LLOD        | T LLOD, W <3 data    | T LLOD, W LLOD       | T LLOD, W <3 data    | T LLOD, W LLOD        | T 4.86 (1.00)        | T 4.13 (0.77)         |                       |
|                   | 3Methylpentane      | T LLOD, W LLOD        | T LLOD, W <3 data    | T LLOD, W LLOD       | T LLOD, W <3 data    | T LLOD, W LLOD        | T LLOD, W <3 data    | T 1.81 (0.75)         |                       |
|                   | 224Trimethylpentane | T LLOD, W n/a         | T LLOD, W n/a        | T LLOD, W n/a        | T LLOD, W n/a        | T LLOD, W n/a         | T 2.68 (1.00)        | T 2.61 (0.79)         |                       |
|                   | Alkenes             | Ethene                | T n/a, W LLOD        | T n/a, W <3 data     | T n/a, W LLOD        | T n/a, W <3 data      | T n/a, W LLOD        | T n/a, W <3 data      | T n/a, W 2.71 (0.90)  |
|                   |                     | Propene               | T n/a, W LLOD        | T n/a, W <3 data     | T n/a, W LLOD        | T n/a, W <3 data      | T n/a, W LLOD        | T n/a, W <3 data      | T n/a, W LLOD         |
| Isobutene+1Butene |                     | T LLOD, W n/a         | T LLOD, W n/a        | T LLOD, W n/a        | T LLOD, W n/a        | T LLOD, W n/a         | T LLOD, W n/a        | T 1.84 (0.90)         |                       |
| Isoprene          |                     | T LLOD, W LLOD        | T LLOD, W <3 data    | T LLOD, W LLOD       | T LLOD, W <3 data    | T LLOD, W LLOD        | T LLOD, W <3 data    | T 6.29 (0.65)         |                       |
| aPinene           |                     | T LLOD, W n/a         | T LLOD, W n/a        | T LLOD, W n/a        | T LLOD, W n/a        | T LLOD, W n/a         | T LLOD, W n/a        | T LLOD, W n/a         |                       |
| Tricyclene        |                     | T LLOD, W n/a         | T LLOD, W n/a        | T LLOD, W n/a        | T LLOD, W n/a        | T LLOD, W n/a         | T LLOD, W n/a        | T LLOD, W n/a         |                       |
| Camphene          |                     | T LLOD, W n/a         | T LLOD, W n/a        | T LLOD, W n/a        | T LLOD, W n/a        | T LLOD, W n/a         | T LLOD, W n/a        | T LLOD, W n/a         |                       |
| bPineneMycene     |                     | T LLOD, W n/a         | T LLOD, W n/a        | T LLOD, W n/a        | T LLOD, W n/a        | T LLOD, W n/a         | T LLOD, W n/a        | T NEMR<0, W n/a       |                       |
| LimoneneD3Carene  |                     | T LLOD, W n/a         | T LLOD, W n/a        | T LLOD, W n/a        | T LLOD, W n/a        | T LLOD, W n/a         | T LLOD, W n/a        | T r<0.3, W n/a        |                       |
| Alkynes           |                     | Ethyne                | T n/a, W 5.45 (0.99) | T n/a, W <3 data     | T n/a, W 4.93 (0.94) | T n/a, W <3 data      | T n/a, W 6.86 (1.00) | T n/a, W <3 data      | T n/a, W 10.99 (0.84) |
|                   | Benzene             | T 3.23 (1.00)         | T 2.99 (1.00)        | T 2.27 (1.00)        | T 4.25 (0.98)        | T 5.08 (0.95)         | T 3.71 (0.98)        | T 3.34 (0.92)         |                       |
| Aromatics         | Toluene             | T LLOD, W LLOD        | T LLOD, W <3 data    | T LLOD, W LLOD       | T LLOD, W <3 data    | T NaN, W LLOD         | T 4.63 (1.00)        | T 5.08 (0.72)         |                       |
|                   | Ethylbenzene        | T LLOD, W LLOD        | T LLOD, W <3 data    | T LLOD, W LLOD       | T LLOD, W <3 data    | T LLOD, W LLOD        | T LLOD, W <3 data    | T 1.11 (0.87)         |                       |
|                   | mpXylene            | T LLOD, W LLOD        | T LLOD, W <3 data    | T LLOD, W LLOD       | T LLOD, W <3 data    | T LLOD, W LLOD        | T LLOD, W <3 data    | T r<0.3, W LLOD       |                       |
|                   | oXylene             | T LLOD, W LLOD        | T LLOD, W <3 data    | T LLOD, W LLOD       | T LLOD, W <3 data    | T LLOD, W LLOD        | T LLOD, W <3 data    | T r<0.3, W LLOD       |                       |
|                   | Alcohols            | CH3OH                 | T 20.68 (0.99)       | T 15.07 (1.00)       | T 19.21 (0.96)       | T 31.42 (0.96)        | T NEMR<0, W n/a      | T 58.82 (0.99)        | T NEMR<0, W n/a       |
| C2H5OH            |                     | T LLOD, W n/a         | T LLOD, W n/a        | T LLOD, W n/a        | T LLOD, W n/a        | T LLOD                | T 76.10 (0.95)       | T NEMR<0, W n/a       |                       |
| Aldehydes         | HCHO                | F n/a, T 2.32 (0.89)  | F n/a, T 1.74 (0.79) | F n/a, T 3.29 (0.68) | F n/a, T 3.24 (0.95) | F n/a, T r<0.3        | F n/a, T 7.23 (1.00) | F n/a, T r<0.3        |                       |
|                   | CH3CHO              | T 2.63 (0.80)         | T 2.51 (0.53)        | T 1.99 (1.00)        | T 2.43 (0.88)        | T 2.86 (0.63)         | T 21.86 (0.99)       | T NEMR<0, W n/a       |                       |
|                   | Propanal            | T NEMR<0, W n/a       | T 0.25 (0.73)        | T LLOD, W n/a        | T LLOD, W n/a        | T LLOD, W n/a         | T LLOD, W n/a        | T NEMR<0, W n/a       |                       |
|                   | Butanal             | T 0.18 (0.56)         | T 0.10 (0.78)        | T 0.10 (0.36)        | T 0.14 (0.97)        | T LLOD, W n/a         | T 0.56 (0.91)        | T r<0.3, W n/a        |                       |
|                   | Acrolein            | T LLOD, W n/a         | T LLOD, W n/a        | T LLOD, W n/a        | T LLOD, W n/a        | T LLOD, W n/a         | T LLOD, W n/a        | T LLOD, W n/a         |                       |
|                   | Methacrolein        | T LLOD, W n/a         | T LLOD, W n/a        | T LLOD, W n/a        | T LLOD, W n/a        | T LLOD, W n/a         | T LLOD, W n/a        | T r<0.3, W n/a        |                       |
| Ketones           | Acetone             | T 25.27 (0.99)        | T 19.32 (0.99)       | T 22.91 (0.83)       | T 36.45 (0.97)       | T r<0.3, W n/a        | T 49.25 (0.99)       | T 47.00 (0.88)        |                       |
|                   | MEK                 | T 1.51 (0.99)         | T 1.32 (0.99)        | T 1.32 (0.99)        | T 2.15 (1.00)        | T 4.78 (0.44)         | T 6.51 (1.00)        | T 4.82 (0.87)         |                       |
|                   | MVK                 | T r<0.3, W n/a        | T LLOD, W n/a         | T LLOD, W n/a        | T r<0.3, W n/a        |                       |
| Other OVOCs       | MTBE                | T LLOD, W n/a         | T LLOD, W n/a        | T LLOD, W n/a        | T LLOD, W n/a        | T LLOD, W n/a         | T LLOD, W n/a        | T LLOD, W n/a         |                       |
| Other VOCs        | OCS                 | T n/a, W r<0.3        | T n/a, W <3 data     | T n/a, W NEMR<0      | T n/a, W <3 data     | T n/a, W r<0.3        | T n/a, W <3 data     | T n/a, W 3.46 (0.40)  |                       |
|                   | DMS                 | T LLOD, W NEMR<0      | T LLOD, W <3 data    | T LLOD, W LLOD       | T LLOD, W <3 data    | T LLOD, W LLOD        | T LLOD, W <3 data    | T LLOD, W NEMR<0      |                       |
|                   | HCN                 | CC 4.40 (0.91)        | CC 5.83 (0.95)       | CC 5.20 (0.95)       | CC 4.13 (0.94)       | CC r<0.3, T r<0.3     | CC NEMR<0, T NEMR<0  | CC NEMR<0, T NEMR<0   |                       |
|                   | CH3CN               | T 1.96 (0.96)         | T 1.71 (0.95)        | T 1.28 (0.91)        | T 3.55 (0.95)        | T NEMR<0, W n/a       | T NEMR<0             | T NEMR<0, W n/a       |                       |

Table S5. Continued

| Classes          | Plume intercept #<br>Species | 37                     | 38                | 40                   | 41                   | 48                    | 50                | 51                      |                      |
|------------------|------------------------------|------------------------|-------------------|----------------------|----------------------|-----------------------|-------------------|-------------------------|----------------------|
| Organic nitrates | Methyl nitrate               | T n/a, W r<0.3         | T n/a, W <3 data  | T n/a, W r<0.3       | T n/a, W <3 data     | T n/a, W 0.32 (0.90)  | T n/a, W <3 data  | T n/a, W 0.05 (0.96)    |                      |
|                  | Ethyl nitrate                | T LLOD, W 0.03 (0.54)  | T NaN, W <3 data  | T NaN, W 0.03 (0.46) | T NaN, W <3 data     | T NaN, W 0.18 (0.84)  | T NaN, W <3 data  | T NaN, W 0.06 (0.51)    |                      |
|                  | Isopropyl nitrate            | T 0.05 (0.94)          | T 0.05 (0.94)     | T 0.07 (0.94)        | T NEMR<0, W <3 data  | T 0.38 (0.85)         | T 0.39 (0.93)     | T 0.51 (0.85)           |                      |
|                  | nPropyl nitrate              | T n/a, W 0.85 (0.85)   | T n/a, W <3 data  | T n/a, W 0.01 (0.45) | T n/a, W <3 data     | T n/a, W 0.07 (0.41)  | T n/a, W <3 data  | T n/a, W 0.03 (0.99)    |                      |
|                  | 2Butyl nitrate               | T n/a, W 0.03 (0.92)   | T n/a, W <3 data  | T n/a, W r<0.3       | T n/a, W <3 data     | T n/a, W 0.48 (0.33)  | T n/a, W <3 data  | T n/a, W 0.24 (0.84)    |                      |
|                  | 3Pentyl nitrate              | T n/a, W LLOD          | T n/a, W <3 data  | T n/a, W NEMR<0      | T n/a, W <3 data     | T n/a, W 0.05 (0.30)  | T n/a, W <3 data  | T n/a, W 0.23 (0.90)    |                      |
|                  | 2Pentyl nitrate              | T n/a, W LLOD          | T n/a, W <3 data  | T n/a, W NEMR<0      | T n/a, W <3 data     | T n/a, W NEMR<0       | T n/a, W <3 data  | T n/a, W 0.27 (0.33)    |                      |
|                  | 3Methyl2butyl nitrate        | T n/a, W LLOD          | T n/a, W <3 data  | T n/a, W NEMR<0      | T n/a, W <3 data     | T n/a, W NEMR<0       | T n/a, W <3 data  | T n/a, W 0.70 (0.83)    |                      |
|                  | Halogens                     | CFC12                  | T n/a, W NEMR<0   | T n/a, W <3 data     | T n/a, W 0.11 (0.59) | T n/a, W <3 data      | T n/a, W r<0.3    | T n/a, W <3 data        | T n/a, W 0.52 (0.52) |
| CFC11            |                              | T n/a, W NEMR<0        | T n/a, W <3 data  | T n/a, W 0.03 (0.61) | T n/a, W <3 data     | T n/a, W r<0.3        | T n/a, W <3 data  | T n/a, W r<0.3          |                      |
| CFC113           |                              | T LLOD, W NEMR<0       | T NaN, W <3 data  | T NaN, W 0.03 (0.49) | T NaN, W <3 data     | T NaN, W 0.12 (0.86)  | T NaN, W <3 data  | T NaN, W 0.31 (0.63)    |                      |
| CFC114           |                              | T n/a, W NEMR<0        | T n/a, W <3 data  | T n/a, W r<0.3       | T n/a, W <3 data     | T n/a, W 0.07 (0.66)  | T n/a, W <3 data  | T n/a, W r<0.3          |                      |
| HFC152a          |                              | T n/a, W NEMR<0        | T n/a, W <3 data  | T n/a, W r<0.3       | T n/a, W <3 data     | T n/a, W NEMR<0       | T n/a, W <3 data  | T n/a, W NaN            |                      |
| HFC134a          |                              | T n/a, W NEMR<0        | T n/a, W <3 data  | T NaN, W r<0.3       | T n/a, W <3 data     | T n/a, W NEMR<0       | T n/a, W <3 data  | T n/a, W 1.36 (0.97)    |                      |
| HFC365mfc        |                              | T n/a, W LLOD          | T n/a, W <3 data  | T n/a, W LLOD        | T n/a, W <3 data     | T n/a, W NaN          | T n/a, W <3 data  | T n/a, W NaN            |                      |
| HCFC124          |                              | T n/a, W LLOD          | T n/a, W <3 data  | T n/a, W LLOD        | T n/a, W <3 data     | T n/a, W NaN          | T n/a, W <3 data  | T n/a, W NaN            |                      |
| HCFC22           |                              | T n/a, W NEMR<0        | T n/a, W <3 data  | T n/a, W 0.14 (0.76) | T n/a, W <3 data     | T n/a, W 0.63 (0.98)  | T n/a, W <3 data  | T n/a, W 1.55 (0.89)    |                      |
| HCFC142b         |                              | T n/a, W r<0.3         | T n/a, W <3 data  | T n/a, W 0.01 (0.66) | T n/a, W <3 data     | T n/a, W 0.14 (0.63)  | T n/a, W <3 data  | T n/a, W 0.13 (0.72)    |                      |
| HCFC141b         |                              | T n/a, W NEMR<0        | T n/a, W <3 data  | T n/a, W r<0.3       | T n/a, W <3 data     | T n/a, W 0.17 (0.99)  | T n/a, W <3 data  | T n/a, W 0.38 (0.99)    |                      |
| H1301            |                              | T n/a, W r<0.3         | T n/a, W <3 data  | T n/a, W 0.00 (0.70) | T n/a, W <3 data     | T n/a, W 0.01 (0.89)  | T n/a, W <3 data  | T n/a, W NEMR<0         |                      |
| H2402            |                              | T n/a, W r<0.3         | T n/a, W <3 data  | T n/a, W r<0.3       | T n/a, W <3 data     | T n/a, W 0.00 (0.58)  | T n/a, W <3 data  | T n/a, W 0.00 (0.81)    |                      |
| H1211            |                              | T n/a, W NEMR<0        | T n/a, W <3 data  | T n/a, W 0.00 (0.92) | T n/a, W <3 data     | T n/a, W r<0.3        | T n/a, W <3 data  | T n/a, W r<0.3          |                      |
| CH3CCl3          |                              | T n/a, W NEMR<0        | T n/a, W <3 data  | T n/a, W NEMR<0      | T n/a, W <3 data     | T n/a, W 0.04 (0.48)  | T n/a, W <3 data  | T n/a, W 0.02 (0.97)    |                      |
| CCl4             |                              | T n/a, W NEMR<1        | T n/a, W <3 data  | T n/a, W r<0.3       | T n/a, W <3 data     | T n/a, W NEMR<0       | T n/a, W <3 data  | T n/a, W 0.24 (0.48)    |                      |
| CHCl3            |                              | T 0.03 (0.55)          | T 0.04 (1.00)     | T r<0.3, W NEMR<0    | T NEMR<0, W <3 data  | T 0.19 (0.86)         | T 0.12 (0.95)     | T 0.11 (0.66)           |                      |
| CH2Cl2           |                              | T 0.20 (0.63)          | T 0.15 (0.94)     | T 0.06 (0.58)        | T r<0.3, W <3 data   | T 0.36 (0.41)         | T 0.34 (0.66)     | T 0.61 (0.58)           |                      |
| C2Cl4            |                              | T 0.01 (0.37)          | T 0.01 (0.98)     | T 0.00 (0.35)        | T NEMR<0, W <3 data  | T 0.06 (0.51)         | T 0.09 (0.71)     | T r<0.3, W 0.03 (0.99)  |                      |
| CH3Cl            |                              | T LLOD, W 0.51 (1.00)  | T NaN, W <3 data  | T NaN, W 0.88 (0.83) | T NaN, W <3 data     | T LLOD, W NEMR<0      | T NaN, W <3 data  | T NaN, W 1.51 (0.29)    |                      |
| CH3Br            |                              | T LLOD, W r<0.3        | T NaN, W <3 data  | T NaN, W LLOD        | T NaN, W <3 data     | T LLOD, W r<0.3       | T NaN, W <3 data  | T NaN, W r<0.3          |                      |
| CH3I             |                              | T 0.01 (0.81)          | T 0.01 (0.97)     | T 0.00 (1.00)        | T 0.01 (0.93)        | T r<0.3, W NEMR<0     | T 0.01 (0.97)     | T 0.01 (0.37)           |                      |
| CH2Br2           |                              | T r<0.3, W 0.00 (0.41) | T 0.00 (0.88)     | T r<0.3, W NEMR<0    | T NEMR<0, W <3 data  | T 0.01 (0.66)         | T 0.00 (0.33)     | T NEMR<0, W 0.01 (1.00) |                      |
| CHBrCl2          |                              | T LLOD, W r<0.3        | T LLOD, W <3 data | T LLOD, W r<0.3      | T LLOD, W <3 data    | T LLOD, W 0.01 (0.80) | T LLOD, W <3 data | T LLOD, W 0.01 (1.00)   |                      |
| CHBr2Cl          |                              | T LLOD, W r<0.4        | T LLOD, W <3 data | T LLOD, W r<0.3      | T LLOD, W <3 data    | T LLOD, W 0.01 (0.73) | T LLOD, W <3 data | T NEMR<0, W 0.01 (0.99) |                      |
| CHBr3            |                              | T r<0.3, W r<0.3       | T 0.00 (0.80)     | T NEMR<0, W r<0.3    | T 0.00 (0.31)        | T 0.02 (0.89)         | T 0.01 (0.80)     | T 0.02 (0.71)           |                      |
| CH2ClCH2Cl       |                              | T n/a, W r<0.3         | T n/a, W <3 data  | T n/a, W NEMR<0      | T n/a, W <3 data     | T n/a, W r<0.3        | T n/a, W <3 data  | T n/a, W 0.52 (0.56)    |                      |
| ClBenzene        |                              | T LLOD, W n/a          | T LLOD, W <3 data | T LLOD, W n/a        | T LLOD, W n/a        | T 0.02 (0.69)         | T 0.01 (0.97)     | T 0.04 (0.82)           |                      |
| CH2ClI           |                              | T LLOD, W n/a          | T LLOD, W <3 data | T LLOD, W n/a        | T LLOD, W n/a        | T LLOD, W n/a         | T LLOD, W <3 data | T LLOD, W n/a           |                      |
| CH2BrI           |                              | T LLOD, W n/a          | T LLOD, W <3 data | T LLOD, W n/a        | T LLOD, W n/a        | T LLOD, W n/a         | T LLOD, W <3 data | T LLOD, W n/a           |                      |
| CH2I2            |                              | T LLOD, W n/a          | T LLOD, W <3 data | T LLOD, W n/a        | T LLOD, W n/a        | T LLOD, W n/a         | T LLOD, W <3 data | T LLOD, W n/a           |                      |
| HCOOH            |                              | HCOOH                  | IC 47.91 (0.98)   | IC 42.98 (0.96)      | IC 112.33 (0.95)     | IC 129.26 (0.93)      | IC 31.03 (0.82)   | IC 87.41 (0.94)         | IC 55.29 (0.69)      |
| OC               |                              | OC                     | H 33.38 (0.88)    | H 36.69 (0.89)       | H 36.00 (0.94)       | H 31.03 (0.91)        | H 78.34 (0.64)    | H 136.29 (0.72)         | H r<0.3              |

**Table S6.** Primary emission ratios (ERs, ppt C/ppb CO) for fire-emitted ROC species

| Classes          | ATom reported species <sup>a</sup>     | Reference                                 | Savanna & grassland | Agricultural residues | Tropical forest | Temperate forest | Boreal forest |
|------------------|----------------------------------------|-------------------------------------------|---------------------|-----------------------|-----------------|------------------|---------------|
| Alkanes          | Ethane                                 | Andreae 2019                              | 11.24               | 19.25                 | 15.80           | 11.50            | 14.93         |
|                  | Propane                                | Andreae 2019                              | 3.70                | 4.19                  | 9.78            | 4.67             | 4.64          |
|                  | iButane                                | Andreae 2019                              | 0.21                | 0.41                  | 0.27            | 0.52             | 0.83          |
|                  | nButane                                | Andreae 2019                              | 0.58                | 1.09                  | 0.76            | 1.38             | 1.76          |
|                  | Isopentane                             | Akagi 2011                                | 0.06                | 0.51                  | 0.19            | n/a              | 0.61          |
|                  | nPentane                               | Andreae 2019                              | 0.18                | 1.06                  | 0.27            | 0.58             | 0.81          |
|                  | nHexane                                | Andreae 2019                              | 0.51                | 0.81                  | 0.59            | 0.55             | 0.87          |
|                  | nHeptane                               | Andreae 2019                              | 0.45                | 0.80                  | 0.44            | 0.50             | 0.34          |
|                  | 2Methylpentane                         | Akagi 2011                                | n/a                 | n/a                   | n/a             | n/a              | n/a           |
|                  | 3Methylpentane                         | Akagi 2011                                | n/a                 | n/a                   | n/a             | n/a              | n/a           |
|                  | 224Trimethylpentane                    | n/a                                       |                     |                       |                 |                  |               |
| Alkenes          | Ethene                                 | Andreae 2019                              | 24.06               | 26.10                 | 21.22           | 19.75            | 25.37         |
|                  | Propene                                | Andreae 2019                              | 13.37               | 12.37                 | 16.55           | 10.63            | 11.10         |
|                  | Isobutene+1Butene                      | Andreae 2019                              | 1.78                | 2.12                  | 1.75            | 1.83             | 1.75          |
|                  | Isoprene                               | Andreae 2019                              | 3.01                | 4.59                  | 4.34            | 1.83             | 1.26          |
|                  | aPinene                                |                                           |                     |                       |                 |                  |               |
|                  | Tricyclene                             |                                           |                     |                       |                 |                  |               |
|                  | Camphene                               | Reported as terpene group in Andreae 2019 | 3.09                | 0.72                  | 2.96            | 21.35            | 25.96         |
|                  | bPineneMyrcene                         |                                           |                     |                       |                 |                  |               |
| LimoneneD3Carene |                                        |                                           |                     |                       |                 |                  |               |
| Alkyne           | Ethyne                                 | Andreae 2019                              | 9.73                | 7.69                  | 7.30            | 5.94             | 5.02          |
| Aromatics        | Benzene                                | Andreae 2019                              | 10.27               | 7.63                  | 7.85            | 8.03             | 10.12         |
|                  | Toluene                                | Andreae 2019                              | 5.87                | 4.70                  | 3.90            | 5.16             | 6.19          |
|                  | Ethylbenzene                           | Andreae 2019                              | 0.67                | 1.22                  | 0.87            | 0.76             | 0.66          |
|                  | mpXylene                               | Reported as xylene group in Andreae 2019  | 2.62                | 2.91                  | 1.75            | 2.98             | 1.84          |
| oXylene          |                                        |                                           |                     |                       |                 |                  |               |
| Alcohols         | CH3OH                                  | Andreae 2019                              | 17.08               | 37.86                 | 23.50           | 17.08            | 16.80         |
|                  | C2H5OH                                 | Andreae 2019                              | 0.64                | 0.79                  | 0.79            | 0.82             | 0.58          |
| Aldehydes        | HCHO                                   | Andreae 2019                              | 16.60               | 22.03                 | 21.49           | 16.90            | 13.46         |
|                  | <b>CH3CHO</b>                          | Andreae 2019                              | 15.45               | 30.04                 | 27.59           | 13.67            | 8.50          |
|                  | Propanal                               | Andreae 2019                              | 1.11                | 3.42                  | 1.39            | 1.11             | 2.91          |
|                  | Butanal                                | Andreae 2019                              | 2.56                | 3.41                  | 1.89            | 1.51             | 1.97          |
|                  | Acrolein                               | Andreae 2019                              | 10.31               | 12.23                 | 9.35            | 4.52             | 4.14          |
|                  | <b>Methacrolein</b>                    | Andreae 2019                              | 2.31                | 5.87                  | 2.30            | 1.99             | 1.45          |
|                  | <b>Hydroxyacetaldehyde<sup>a</sup></b> | Andreae 2019                              | 1.78                | 38.92                 | 2.92            | 3.23             | 2.92          |
|                  |                                        |                                           |                     |                       |                 |                  |               |
| Ketones          | Acetone                                | Andreae 2019                              | 9.84                | 13.48                 | 8.75            | 9.77             | 18.98         |
|                  | MEK                                    | Andreae 2019                              | 2.94                | 11.78                 | 7.46            | 3.14             | 2.04          |
|                  | <b>MVK</b>                             | Andreae 2019                              | 5.32                | 10.07                 | 5.99            | 2.34             | 1.31          |
|                  | <b>Hydroxyacetone<sup>a</sup></b>      | Andreae 2019                              | 9.12                | 46.38                 | 19.71           | 11.38            | 19.71         |
| Other OVOCs      | HCOOH                                  | Andreae 2019                              | 1.83                | 4.45                  | 2.83            | 4.90             | 5.22          |
|                  | MTBE                                   | Use methyl vinyl ether from Akagi 2011    | 3.35                | 1.52                  | n/a             | n/a              | n/a           |
| Other VOCs       | OCS                                    | Akagi 2011                                | n/a                 | n/a                   | 0.11            | n/a              | 1.77          |
|                  | DMS                                    | Andreae 2019                              | 0.05                | 0.27                  | 0.01            | 0.06             | 0.01          |
|                  | HCN                                    | Andreae 2019                              | 6.60                | 5.71                  | 4.38            | 5.89             | 4.53          |
|                  | <b>CH3CN</b>                           | Akagi 2011                                | 2.17                | 3.76                  | 5.37            | 2.70             | 3.47          |
|                  |                                        |                                           |                     |                       |                 |                  |               |
| Organic nitrates | Methyl nitrate                         | Akagi 2011                                | 0.00                | n/a                   | 0.03            | n/a              | 0.01          |
|                  | Ethyl nitrate                          | Akagi 2011                                | n/a                 | n/a                   | 0.03            | n/a              | 0.01          |
|                  | Isopropyl nitrate                      | Akagi 2011                                | n/a                 | n/a                   | 0.01            | n/a              | 0.02          |
|                  | nPropyl nitrate                        | Akagi 2011                                | n/a                 | n/a                   | 0.00            | n/a              | 0.00          |
|                  | 2Butyl nitrate                         | Akagi 2011                                | n/a                 | n/a                   | 0.01            | n/a              | 0.03          |
|                  | 3Pentyl nitrate                        | Akagi 2011                                | n/a                 | n/a                   | n/a             | n/a              | n/a           |
|                  | 2Pentyl nitrate                        | Akagi 2011                                | n/a                 | n/a                   | n/a             | n/a              | n/a           |
|                  | 3Methyl2butyl nitrate                  | Akagi 2011                                | n/a                 | n/a                   | n/a             | n/a              | n/a           |
| Halogens         | CFC12                                  | n/a                                       |                     |                       |                 |                  |               |
|                  | CFC11                                  | n/a                                       |                     |                       |                 |                  |               |
|                  | CFC113                                 | n/a                                       |                     |                       |                 |                  |               |
|                  | CFC114                                 | n/a                                       |                     |                       |                 |                  |               |
|                  | HFC152a                                | n/a                                       |                     |                       |                 |                  |               |
|                  | HFC134a                                | n/a                                       |                     |                       |                 |                  |               |
|                  | HFC365mfc                              | n/a                                       |                     |                       |                 |                  |               |
|                  | HCFC124                                | n/a                                       |                     |                       |                 |                  |               |
|                  | HCFC22                                 | n/a                                       |                     |                       |                 |                  |               |

|                                                 |              |         |          |         |         |         |
|-------------------------------------------------|--------------|---------|----------|---------|---------|---------|
| HCFC142b                                        | n/a          |         |          |         |         |         |
| HCFC141b                                        | n/a          |         |          |         |         |         |
| H1301                                           | n/a          |         |          |         |         |         |
| H2402                                           | n/a          |         |          |         |         |         |
| H1211                                           | n/a          |         |          |         |         |         |
| CH3CCl3                                         | n/a          |         |          |         |         |         |
| CCl4                                            | n/a          |         |          |         |         |         |
| CHCl3                                           | Akagi 2011   | 0.04    | n/a      | 0.00    | n/a     | n/a     |
| CH2Cl2                                          | n/a          |         |          |         |         |         |
| C2Cl4                                           | n/a          |         |          |         |         |         |
| CH3Cl                                           | Andreae 2019 | 0.50    | 1.21     | 0.15    | 0.21    | 0.27    |
| CH3Br                                           | Andreae 2019 | 0.01    | 0.00     | 0.02    | 0.00    | 0.01    |
| CH3I                                            | Andreae 2019 | 0.00    | 0.00     | 0.01    | 0.00    | 0.00    |
| CH2Br2                                          | Akagi 2011   | n/a     | n/a      | n/a     | n/a     | 0.00    |
| CHBrCl2                                         | n/a          |         |          |         |         |         |
| CHBr2Cl                                         | n/a          |         |          |         |         |         |
| CHBr3                                           | n/a          |         |          |         |         |         |
| CH2ClCH2Cl                                      | n/a          |         |          |         |         |         |
| ClBenzene                                       | n/a          |         |          |         |         |         |
| CH2ClI                                          | n/a          |         |          |         |         |         |
| CH2BrI                                          | n/a          |         |          |         |         |         |
| CH2I2                                           | n/a          |         |          |         |         |         |
| ER of reported VOC                              |              | 201.01  | 351.37   | 242.67  | 199.17  | 224.16  |
| OC                                              | Andreae 2019 | 101.19  | 149.91   | 98.48   | 225.71  | 113.45  |
| ER of reported ROC                              |              | 302.20  | 501.28   | 341.14  | 424.88  | 337.61  |
| ER of unmeasured+unidentified ROC <sup>a</sup>  |              | 201-402 | 351-702  | 243-486 | 199-398 | 224-448 |
| ER of reported+unmeasured/unidentified ROC      |              | 503-704 | 852-1203 | 584-827 | 624-823 | 562-786 |
| <b>ER from known gas-phase HCOOH precursors</b> |              | 91.18   | 188.62   | 118.00  | 96.64   | 107.80  |

<sup>a</sup> Hydroxyacetone and hydroxyacetaldehyde are not reported but included here as known HCOOH precursors

<sup>b</sup> Unmeasured + unidentified ROC are estimated at 1-2× the total reported VOC<sup>22</sup>



## References

- (1) Hoell, J. M., Davis, D. D., Liu, S. C., Newell, R., Shipham, M., Akimoto, H., McNeal, R. J., Bendura, R. J., and Drewry, J. W., Pacific Exploratory Mission-West A (PEM-West A): September-October 1991. *J. Geophys. Res.: Atmos.* **1996**, *101* (D1), 1641-1653, <https://doi.org/10.1029/95jd00622>.
- (2) Fishman, J., Hoell, J. M., Bendura, R. D., McNeal, R. J., and Kirchoff, V. W. J. H., NASA GTE TRACE A experiment (September-October 1992): Overview. *J. Geophys. Res.: Atmos.* **1996**, *101* (D19), 23865-23879, <https://doi.org/10.1029/96jd00123>.
- (3) Hoell, J. M., Davis, D. D., Liu, S. C., Newell, R. E., Akimoto, H., McNeal, R. J., and Bendura, R. J., The Pacific Exploratory Mission-West Phase B: February-March, 1994. *J. Geophys. Res.: Atmos.* **1997**, *102* (D23), 28223-28239, <https://doi.org/10.1029/97jd02581>.
- (4) Hoell, J. M., Davis, D. D., Jacob, D. J., Rodgers, M. O., Newell, R. E., Fuelberg, H. E., McNeal, R. J., Raper, J. L., and Bendura, R. J., Pacific Exploratory Mission in the tropical Pacific: PEM-Tropics A, August-September 1996. *J. Geophys. Res.: Atmos.* **1999**, *104* (D5), 5567-5583, <https://doi.org/10.1029/1998jd100074>.
- (5) Singh, H. B., Thompson, A. M., and Schlager, H., SONEX airborne mission and coordinated POLINAT-2 activity: Overview and accomplishments. *Geophys Res Lett* **1999**, *26* (20), 3053-3056, <https://doi.org/10.1029/1999gl900588>.
- (6) Singh, H., Chen, Y., Tabazadeh, A., Fukui, Y., Bey, I., Yantosca, R., Jacob, D., Arnold, F., Wohlfrom, K., Atlas, E., Flocke, F., Blake, D., Blake, N., Heikes, B., Snow, J., Talbot, R., Gregory, G., Sachse, G., Vay, S., and Kondo, Y., Distribution and fate of selected oxygenated organic species in the troposphere and lower stratosphere over the Atlantic. *J. Geophys. Res.: Atmos.* **2000**, *105* (D3), 3795-3805, <https://doi.org/10.1029/1999jd900779>.
- (7) Kleb, M. M., Chen, G., Crawford, J. H., Flocke, F. M., and Brown, C. C., An overview of measurement comparisons from the INTEX-B/MILAGRO airborne field campaign. *Atmos. Meas. Tech.* **2011**, *4* (1), 9-27, <https://doi.org/10.5194/amt-4-9-2011>.
- (8) Singh, H. B., Brune, W. H., Crawford, J. H., Flocke, F., and Jacob, D. J., Chemistry and transport of pollution over the Gulf of Mexico and the Pacific: spring 2006 INTEX-B campaign overview and first results. *Atmos. Chem. Phys.* **2009**, *9* (7), 2301-2318, <https://doi.org/10.5194/acp-9-2301-2009>.
- (9) Crouse, J. D., McKinney, K. A., Kwan, A. J., and Wennberg, P. O., Measurement of gas-phase hydroperoxides by chemical ionization mass spectrometry. *Anal. Chem.* **2006**, *78* (19), 6726-32, <https://doi.org/10.1021/ac0604235>.
- (10) Koyama, T., and Thoivipson, T. G., Identification and Determination of Organic Acids in Sea Water by Partition Chromatography. *J. Oceanogr. Soc. Jpn.* **1964**, *20* (5), 209-220, <https://doi.org/10.5928/kaiyou1942.20.209>.
- (11) Hama, T., and Handa, N., Volatile Organic Acids in Lake Water; Their Gas Chromatographic Determination and Ecological Significance. *Japanese Journal of Limnology (Rikusuigaku Zasshi)* **1981**, *42* (1), 8-19, <https://doi.org/10.3739/rikusui.42.8>.
- (12) Kieber, D. J., Vaughan, G. M., and Mopper, K., Determination of formate in natural waters by a coupled enzymatic/high-performance liquid chromatographic technique. *Anal. Chem.* **2002**, *60* (17), 1654-1659, <https://doi.org/10.1021/ac00168a004>.
- (13) Vaughan, G. M., and Mopper, K., Determination of nanomolar levels of formate in natural waters based on a luminescence enzymatic assay. *Anal. Chim. Acta* **1990**, *231*, 299-303, [https://doi.org/10.1016/s0003-2670\(00\)86430-2](https://doi.org/10.1016/s0003-2670(00)86430-2).

- (14) Mopper, K., and Kieber, D. J., Distribution and biological turnover of dissolved organic compounds in the water column of the Black Sea. *Deep Sea Res. Part A* **1991**, *38*, S1021-S1047, [https://doi.org/10.1016/s0198-0149\(10\)80022-6](https://doi.org/10.1016/s0198-0149(10)80022-6).
- (15) Paulot, F., Wunch, D., Crouse, J. D., Toon, G. C., Millet, D. B., DeCarlo, P. F., Vigouroux, C., Deutscher, N. M., González Abad, G., Notholt, J., Warneke, T., Hannigan, J. W., Warneke, C., de Gouw, J. A., Dunlea, E. J., De Mazière, M., Griffith, D. W. T., Bernath, P., Jimenez, J. L., and Wennberg, P. O., Importance of secondary sources in the atmospheric budgets of formic and acetic acids. *Atmos. Chem. Phys.* **2011**, *11* (5), 1989-2013, <https://doi.org/10.5194/acp-11-1989-2011>.
- (16) Millet, D. B., Baasandorj, M., Farmer, D. K., Thornton, J. A., Baumann, K., Brophy, P., Chaliyakunnel, S., de Gouw, J. A., Graus, M., Hu, L., Koss, A., Lee, B. H., Lopez-Hilfiker, F. D., Neuman, J. A., Paulot, F., Peischl, J., Pollack, I. B., Ryerson, T. B., Warneke, C., Williams, B. J., and Xu, J., A large and ubiquitous source of atmospheric formic acid. *Atmos. Chem. Phys.* **2015**, *15* (11), 6283-6304, <https://doi.org/10.5194/acp-15-6283-2015>.
- (17) Schill, G. P., Froyd, K. D., Bian, H., Kupc, A., Williamson, C., Brock, C. A., Ray, E., Hornbrook, R. S., Hills, A. J., Apel, E. C., Chin, M., Colarco, P. R., and Murphy, D. M., Widespread biomass burning smoke throughout the remote troposphere. *Nat Geosci* **2020**, *13* (6), 422-427, <https://doi.org/10.1038/s41561-020-0586-1>.
- (18) Andreae, M. O., Emission of trace gases and aerosols from biomass burning – an updated assessment. *Atmos. Chem. Phys.* **2019**, *19* (13), 8523-8546, <https://doi.org/10.5194/acp-19-8523-2019>.
- (19) de Gouw, J. A., Gilman, J. B., Kim, S. W., Alvarez, S. L., Dusanter, S., Graus, M., Griffith, S. M., Isaacman-VanWertz, G., Kuster, W. C., Lefer, B. L., Lerner, B. M., McDonald, B. C., Rappenglück, B., Roberts, J. M., Stevens, P. S., Stutz, J., Thalman, R., Veres, P. R., Volkamer, R., Warneke, C., Washenfelder, R. A., and Young, C. J., Chemistry of Volatile Organic Compounds in the Los Angeles Basin: Formation of Oxygenated Compounds and Determination of Emission Ratios. *J. Geophys. Res.: Atmos.* **2018**, *123* (4), 2298-2319, <https://doi.org/10.1002/2017jd027976>.
- (20) Hecobian, A., Liu, Z., Hennigan, C. J., Huey, L. G., Jimenez, J. L., Cubison, M. J., Vay, S., Diskin, G. S., Sachse, G. W., Wisthaler, A., Mikoviny, T., Weinheimer, A. J., Liao, J., Knapp, D. J., Wennberg, P. O., Kürten, A., Crouse, J. D., Clair, J. S., Wang, Y., and Weber, R. J., Comparison of chemical characteristics of 495 biomass burning plumes intercepted by the NASA DC-8 aircraft during the ARCTAS/CARB-2008 field campaign. *Atmos. Chem. Phys.* **2011**, *11* (24), 13325-13337, <https://doi.org/10.5194/acp-11-13325-2011>.
- (21) Singh, H. B., Cai, C., Kaduwela, A., Weinheimer, A., and Wisthaler, A., Interactions of fire emissions and urban pollution over California: Ozone formation and air quality simulations. *Atmos. Environ.* **2012**, *56*, 45-51, <https://doi.org/10.1016/j.atmosenv.2012.03.046>.
- (22) Akagi, S. K., Yokelson, R. J., Wiedinmyer, C., Alvarado, M. J., Reid, J. S., Karl, T., Crouse, J. D., and Wennberg, P. O., Emission factors for open and domestic biomass burning for use in atmospheric models. *Atmos. Chem. Phys.* **2011**, *11* (9), 4039-4072, <https://doi.org/10.5194/acp-11-4039-2011>.
